# Supplementary material for: Synthesis, Characterization, and Biological Activity of a Novel Series of Benzo[4,5]imidazo[2,1-b]thiazole Derivatives as Potential Epidermal Growth Factor Receptor Inhibitors
Source: PubMed Central journal article supplement (PMC6412895; doi:10.3390/molecules24040682), 2019-02-14
Supplement: molecules-24-00682-s001.pdf [file molecules-24-00682-s001.pdf]

Supplementary Materials

***Synthesis, Characterization and Biological Activity of a Novel Series of Benzo[4,5]imidazo[2,1-b]thiazole Derivatives as Potential Epidermal Growth Factor Receptor Inhibitors***

Xinshan Deng <sup>1</sup>, Xiaoyu Tan <sup>1</sup>, Tiantian An <sup>1</sup>, Qingqing Ma <sup>1</sup>, Zhe Jin <sup>1,\*</sup>, Ce Wang <sup>1</sup>, Qingguo Meng <sup>2</sup>, Chun Hu <sup>2,\*</sup>

<sup>1</sup> Key Laboratory of Structure-Based Drug Design & Discovery, Ministry of Education; Shenyang Pharmaceutical University, Shenyang 110016, China; E-Mails: xinshandeng@126.com (X. Deng); tanxiaoyuaikaoyan@163.com (X. Tan); antiantiansyphu@163.com (T. An); maqingqing01@163.com (Q. Ma); jinzheln@163.com (Z. Jin); wangce0412@163.com (C. Wang); chunhu@syphu.edu.cn (C. Hu).

<sup>2</sup> Department of Pharmacy, Yantai Univeristy, Yantai 264005, China; E-Mail: qinggmeng@163.com (Q. Meng).

\* Correspondences: jinzheln@163.com (Z. Jin) and chunhu@syphu.edu.cn (C. Hu); Tel.: +86-24-43520246.

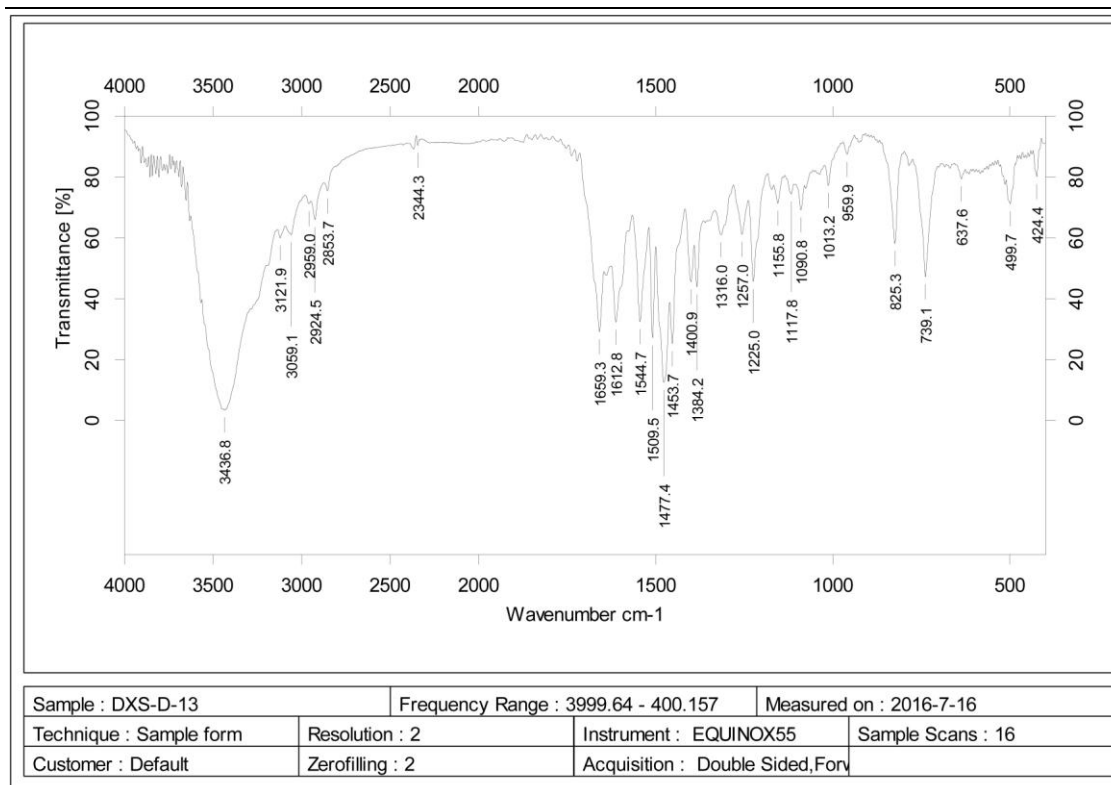

Figure S01. IR spectra of the target compound D01

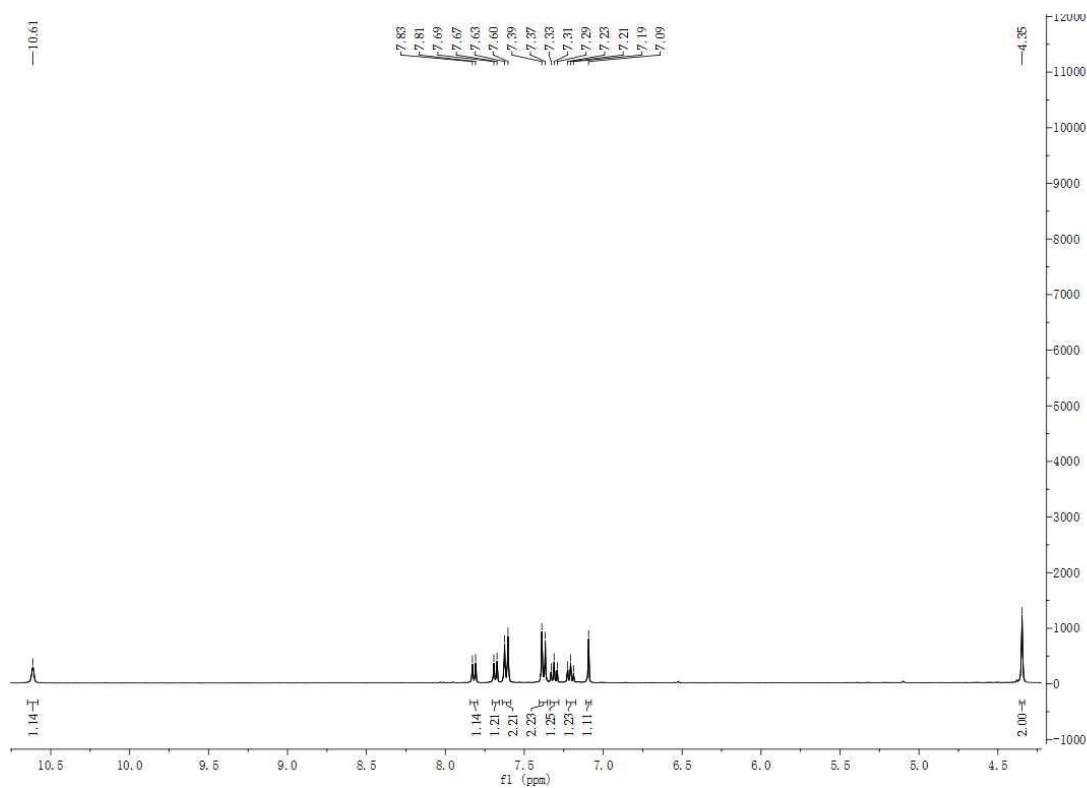

Figure S02. <sup>1</sup>H-NMR spectra of the target compound D01

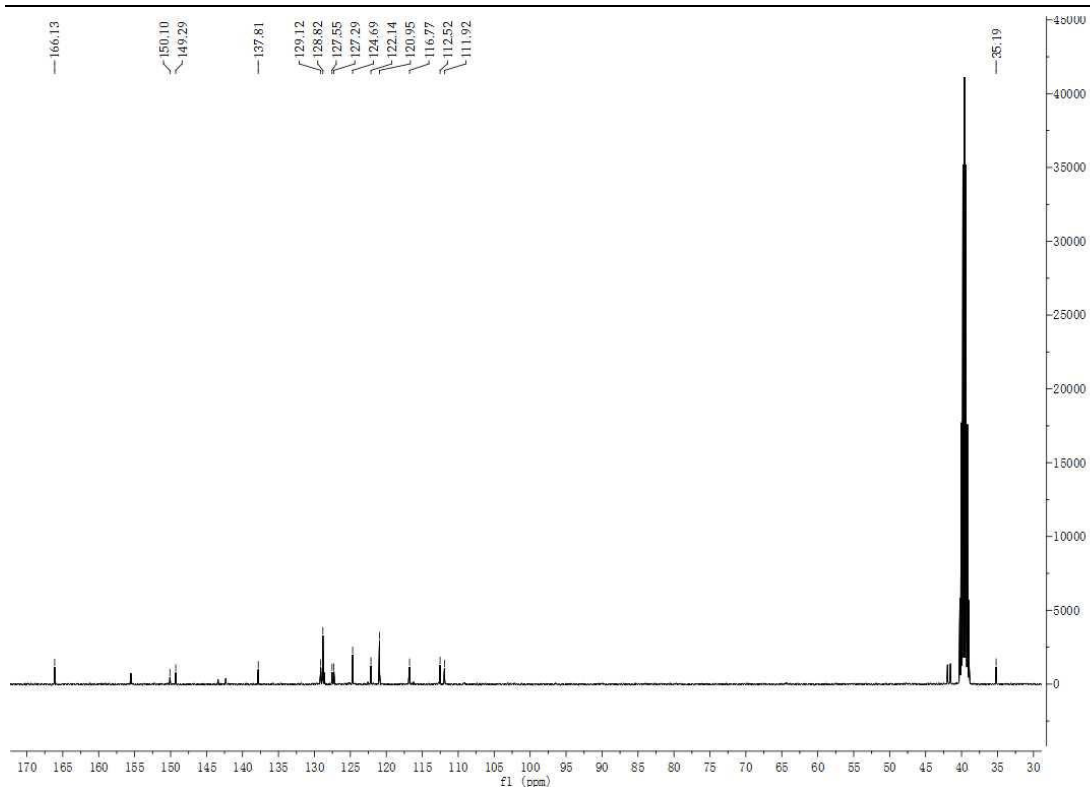

Figure S03.  $^{13}\text{C}$ -NMR spectra of the target compound D01

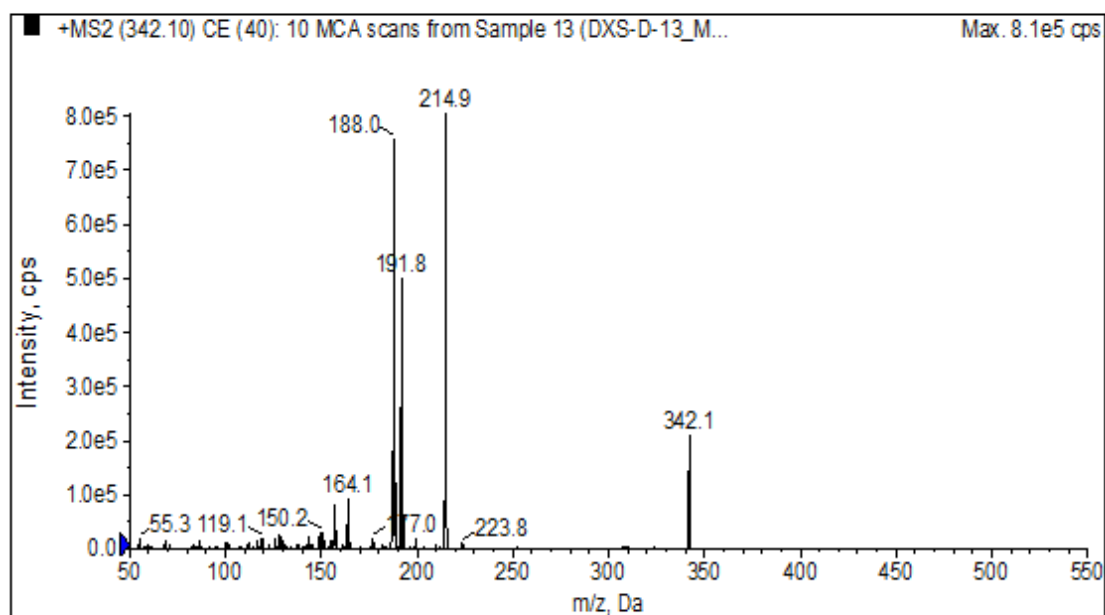

Figure S04. ESI-MS of the target compound D01

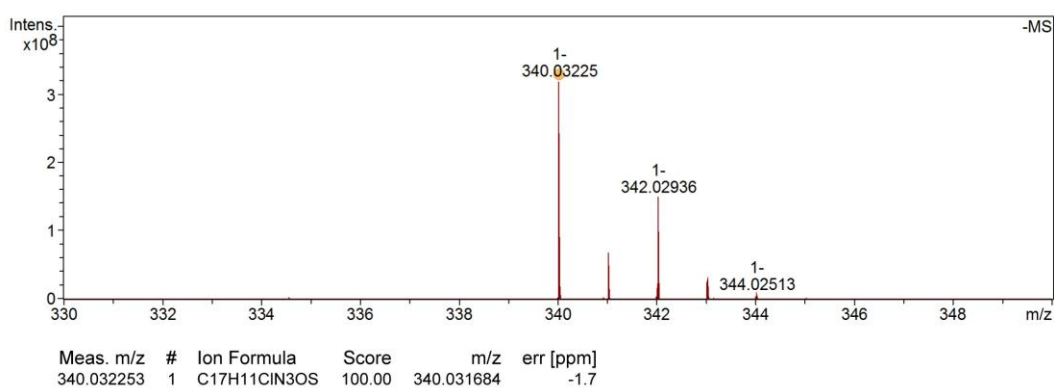

Figure S05. HRMS of the target compound D01

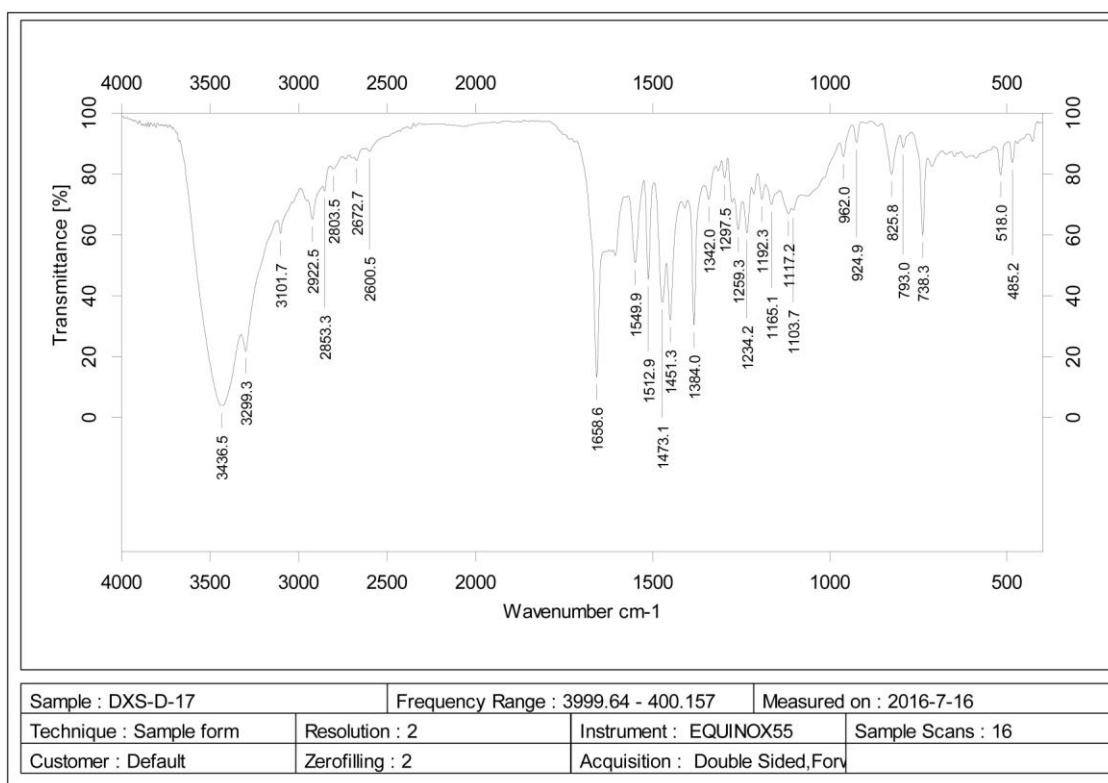

Figure S06. IR spectra of the target compound D02

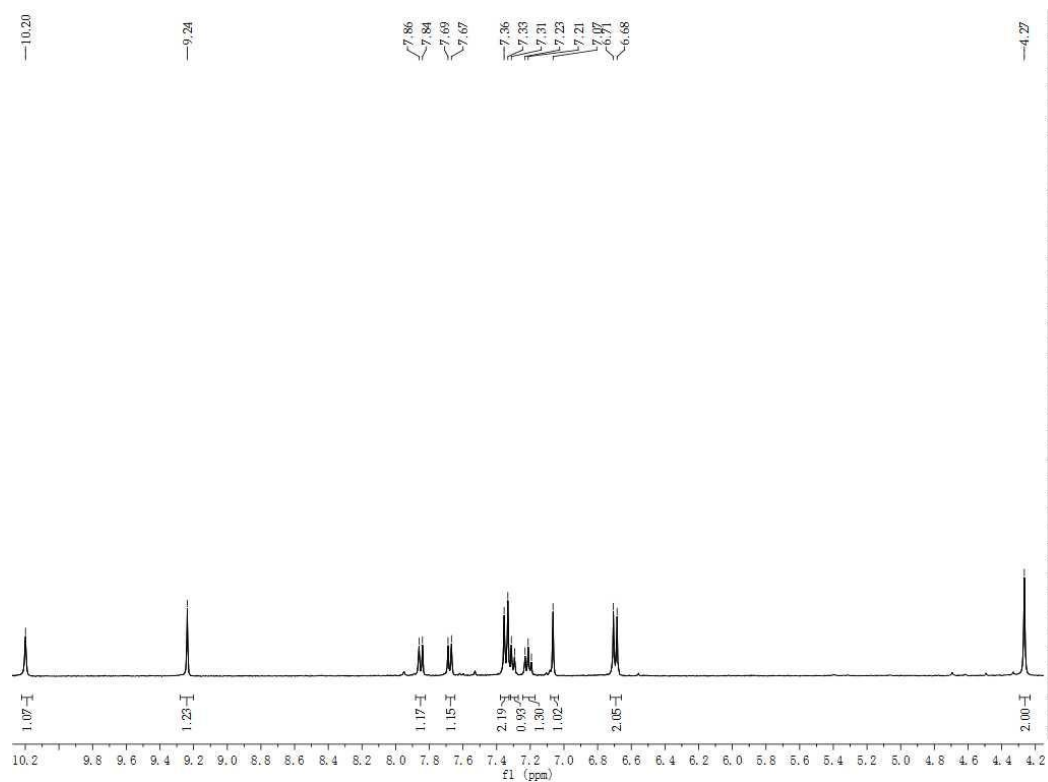

Figure S07. <sup>1</sup>H-NMR spectra of the target compound D02

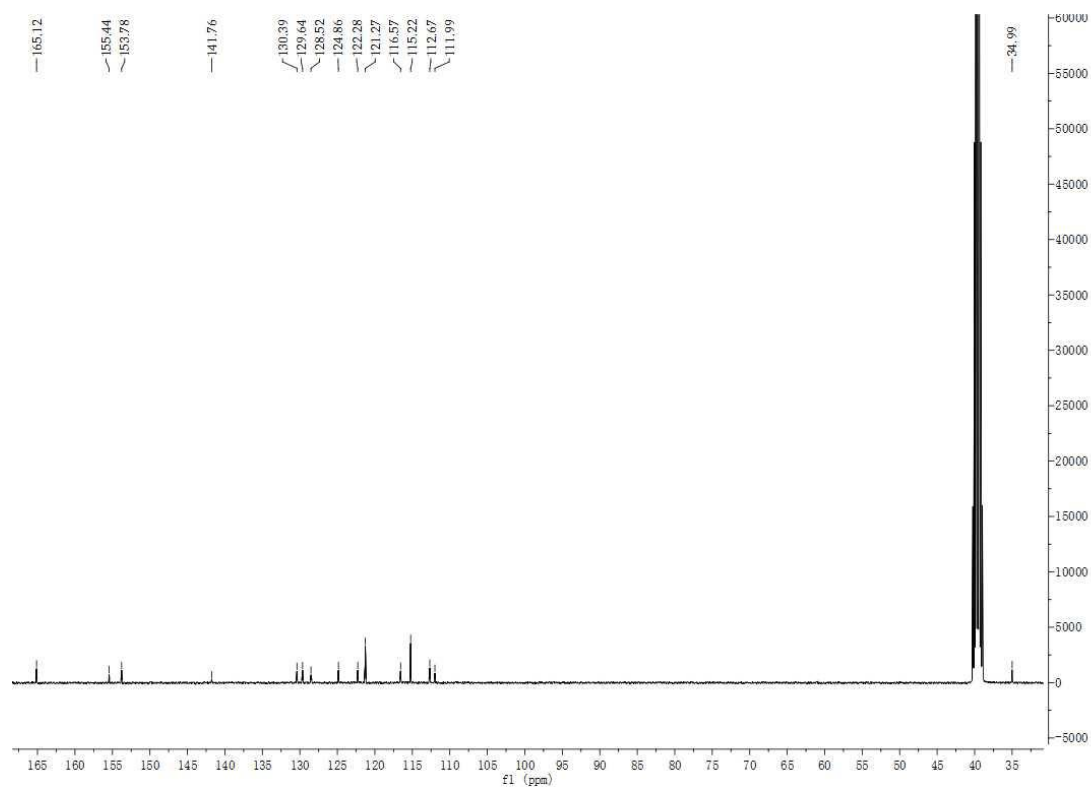

Figure S08. <sup>13</sup>C-NMR spectra of the target compound D02

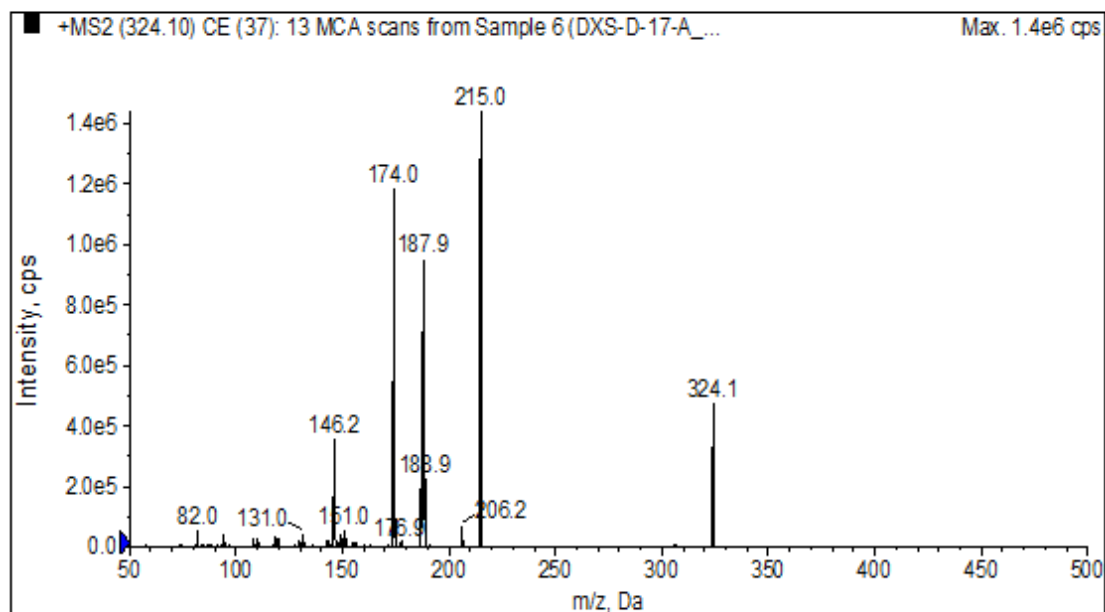

Figure S09. ESI-MS of the target compound D02

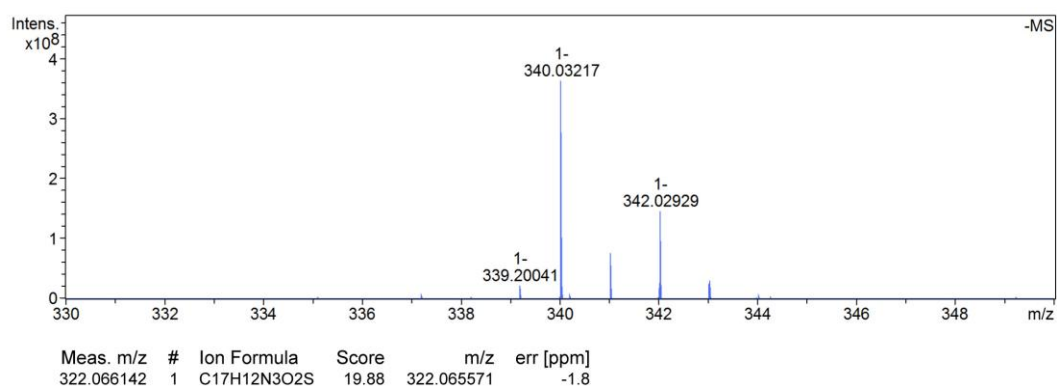

Figure S10. HRMS of the target compound D02

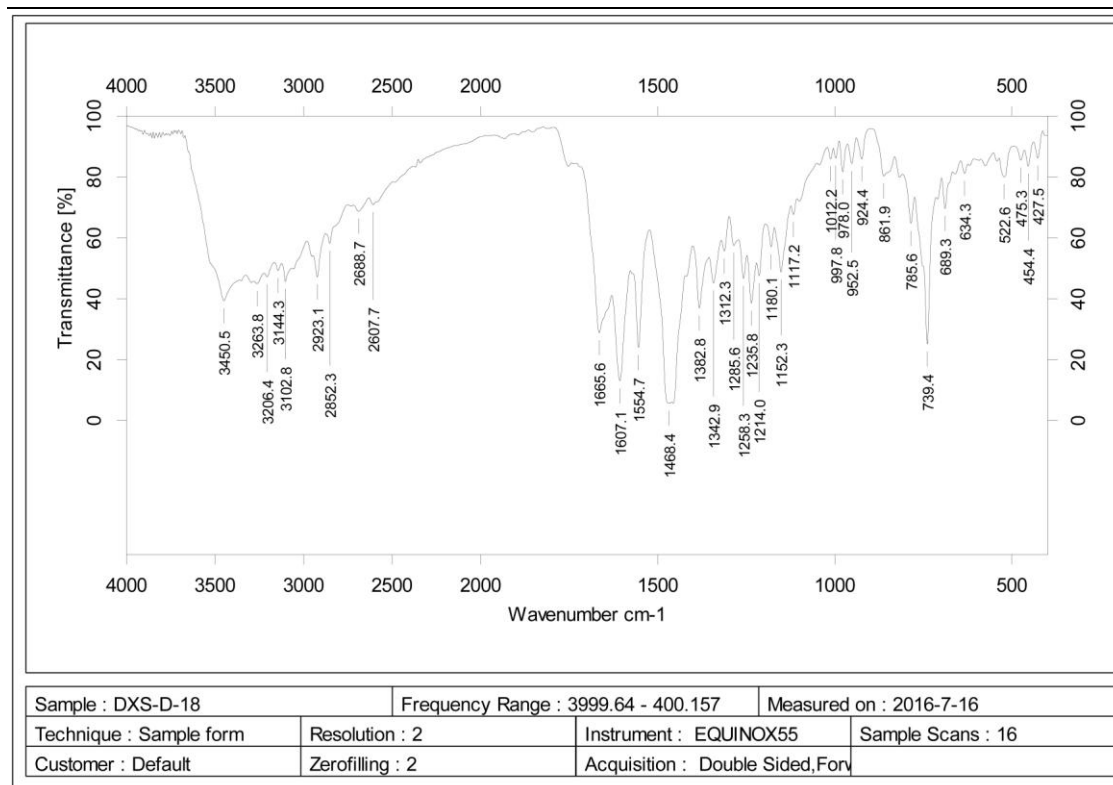

Figure S11. IR spectra of the target compound D03

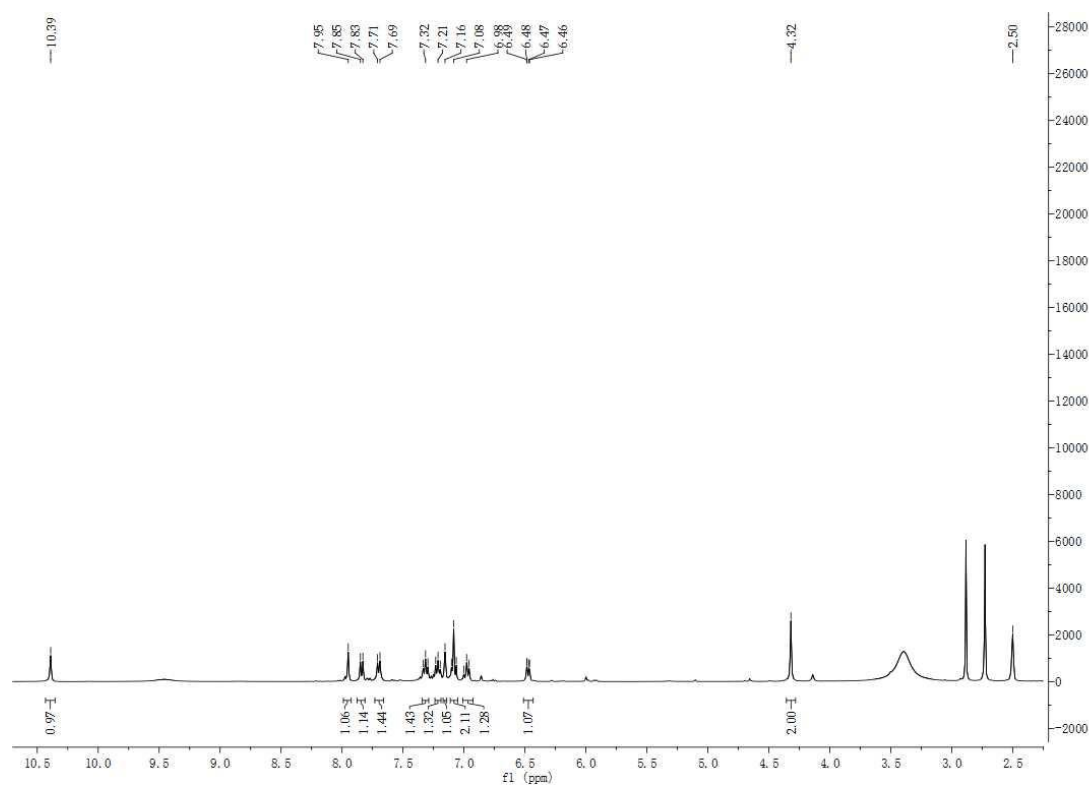

Figure S12. <sup>1</sup>H-NMR spectra of the target compound D03

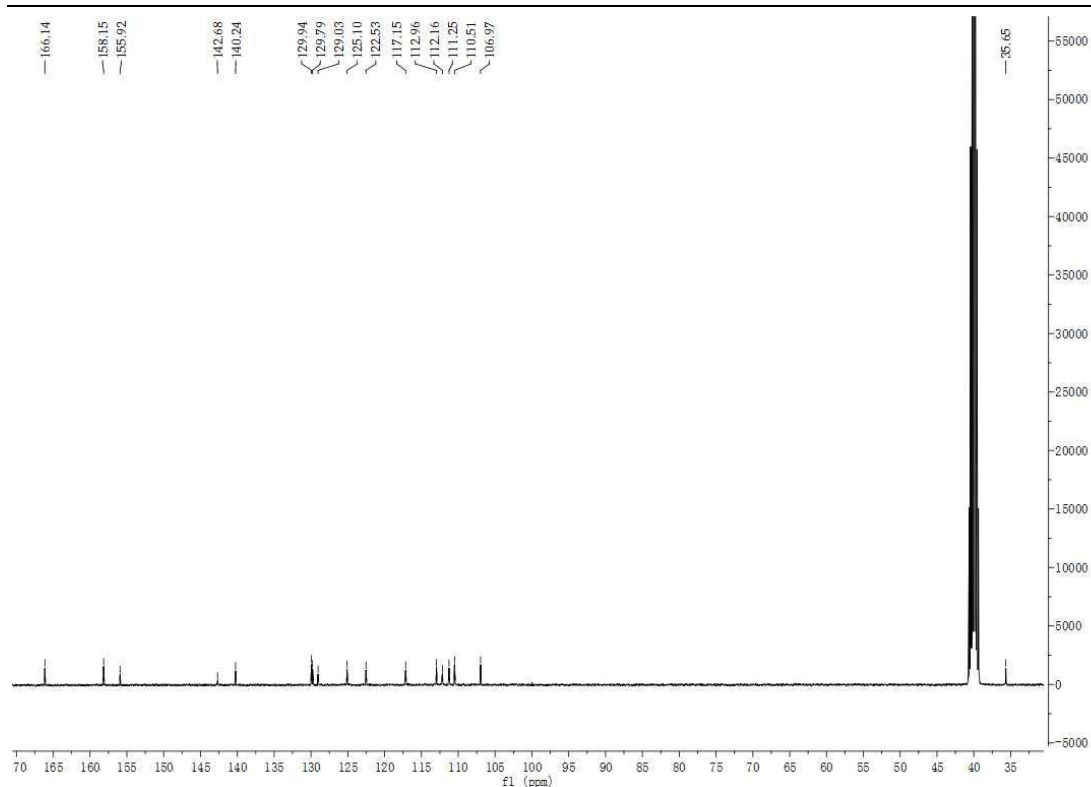

Figure S13.  $^{13}\text{C}$ -NMR spectra of the target compound D03

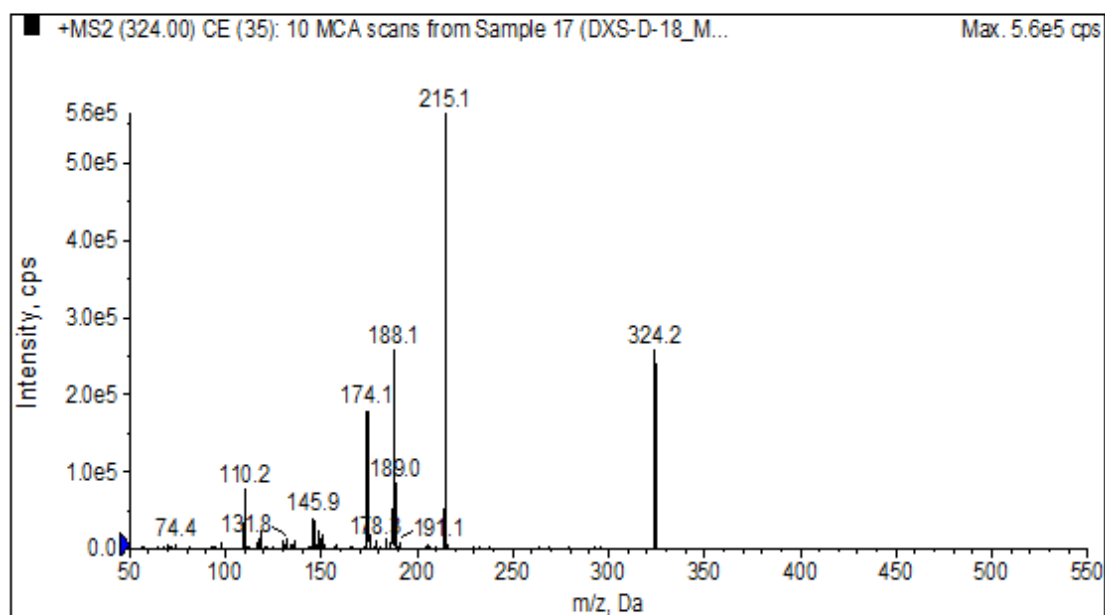

Figure S14. ESI-MS of the target compound D03



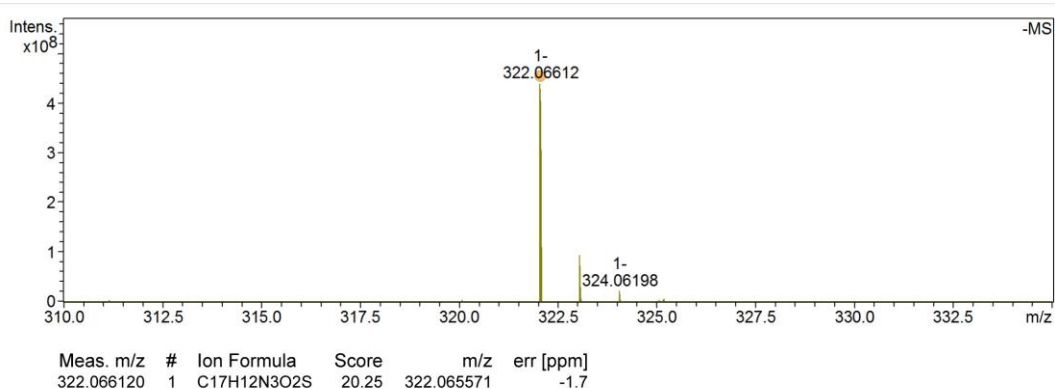

Figure S15. HRMS of the target compound D03

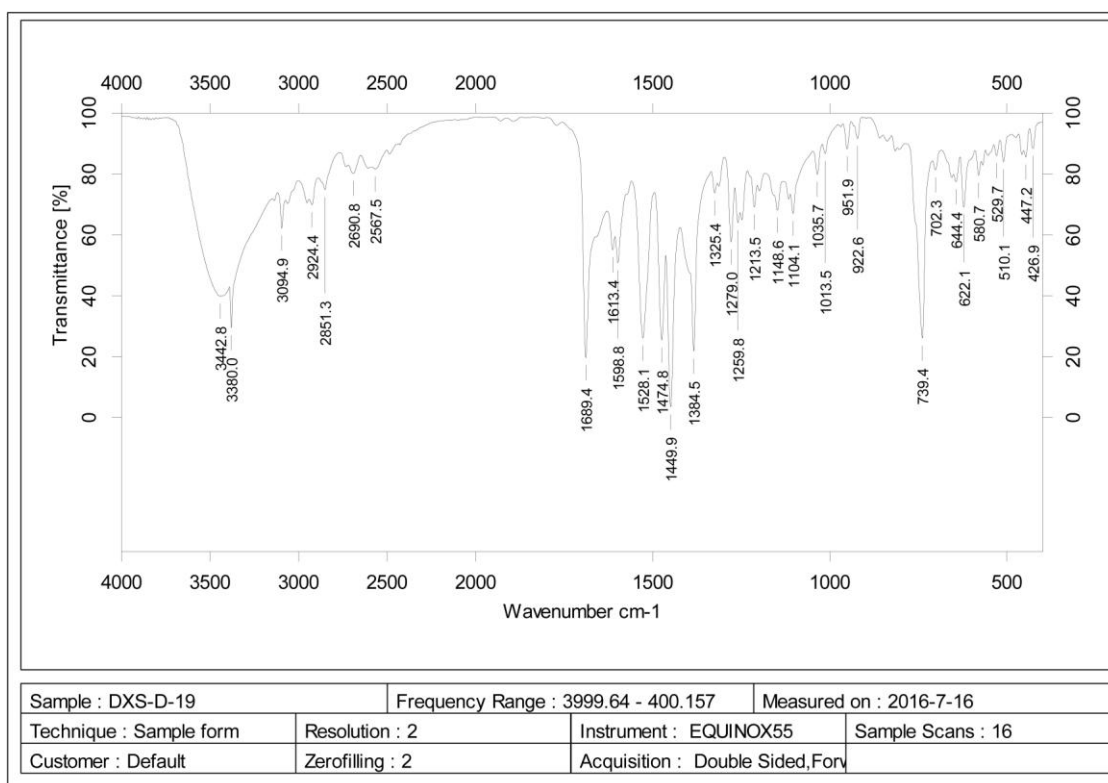

Figure S16. IR spectra of the target compound D04

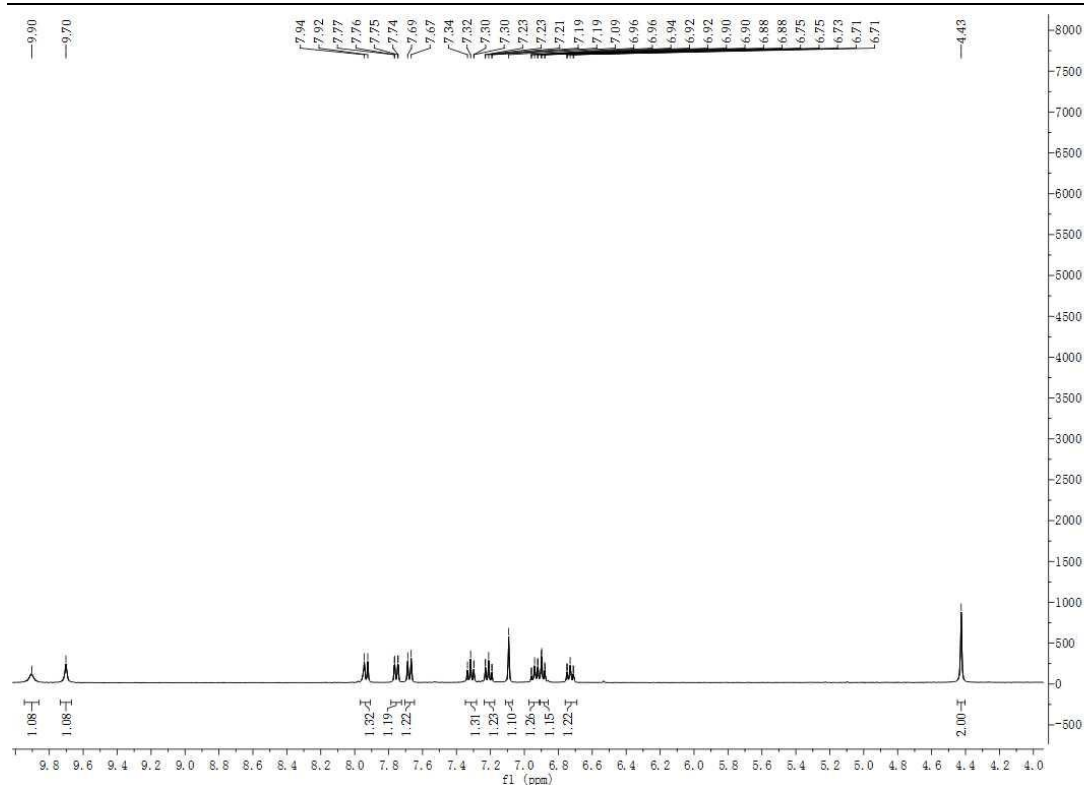

Figure S17. <sup>1</sup>H-NMR spectra of the target compound D04

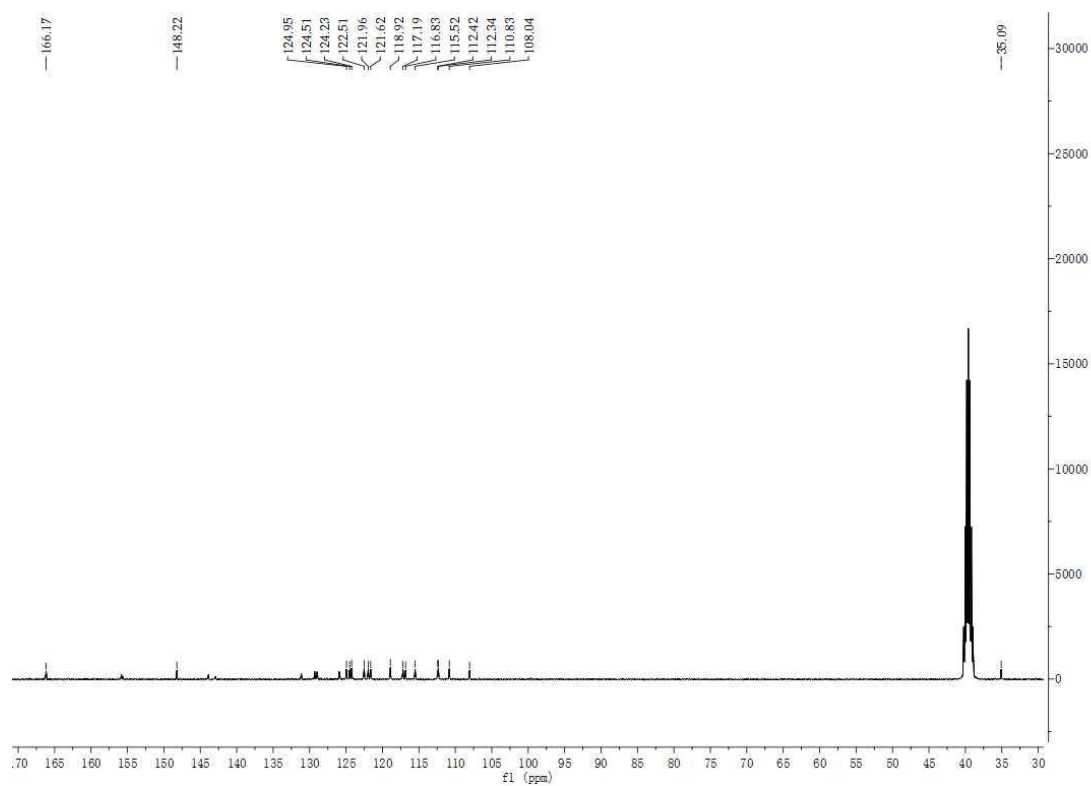

Figure S18. <sup>13</sup>C-NMR spectra of the target compound D04

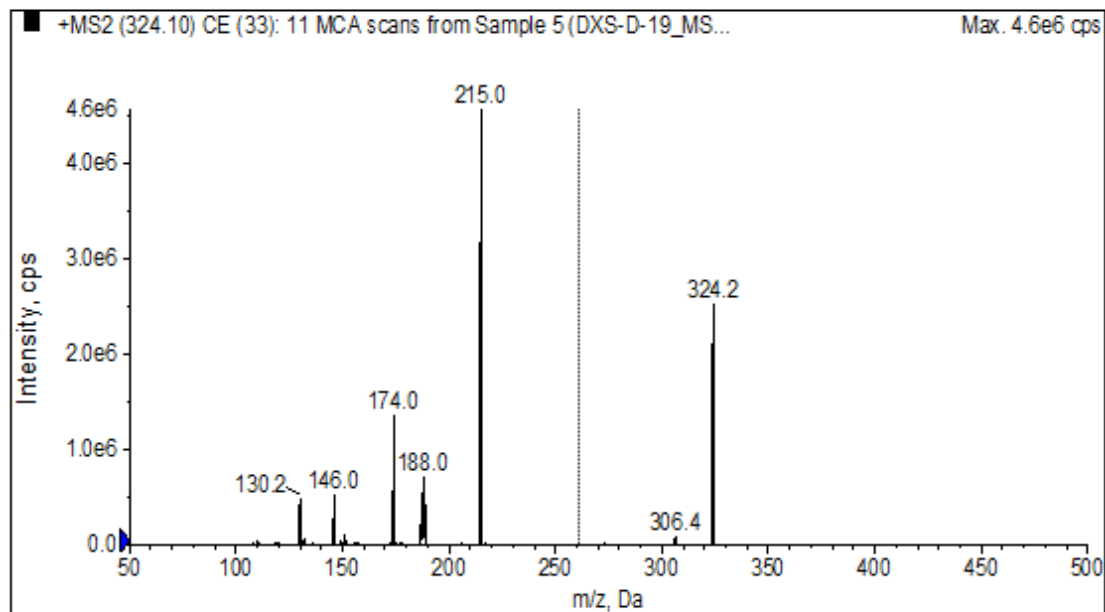

Figure S19. ESI-MS of the target compound D04

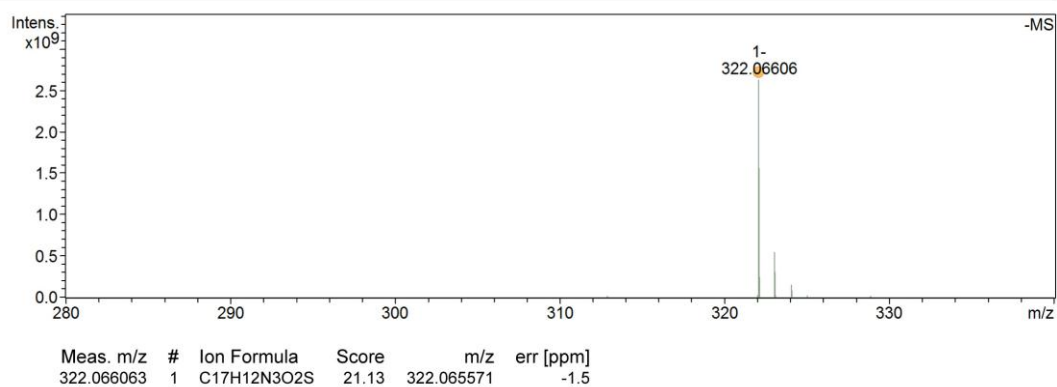

Figure S20. HRMS of the target compound D04

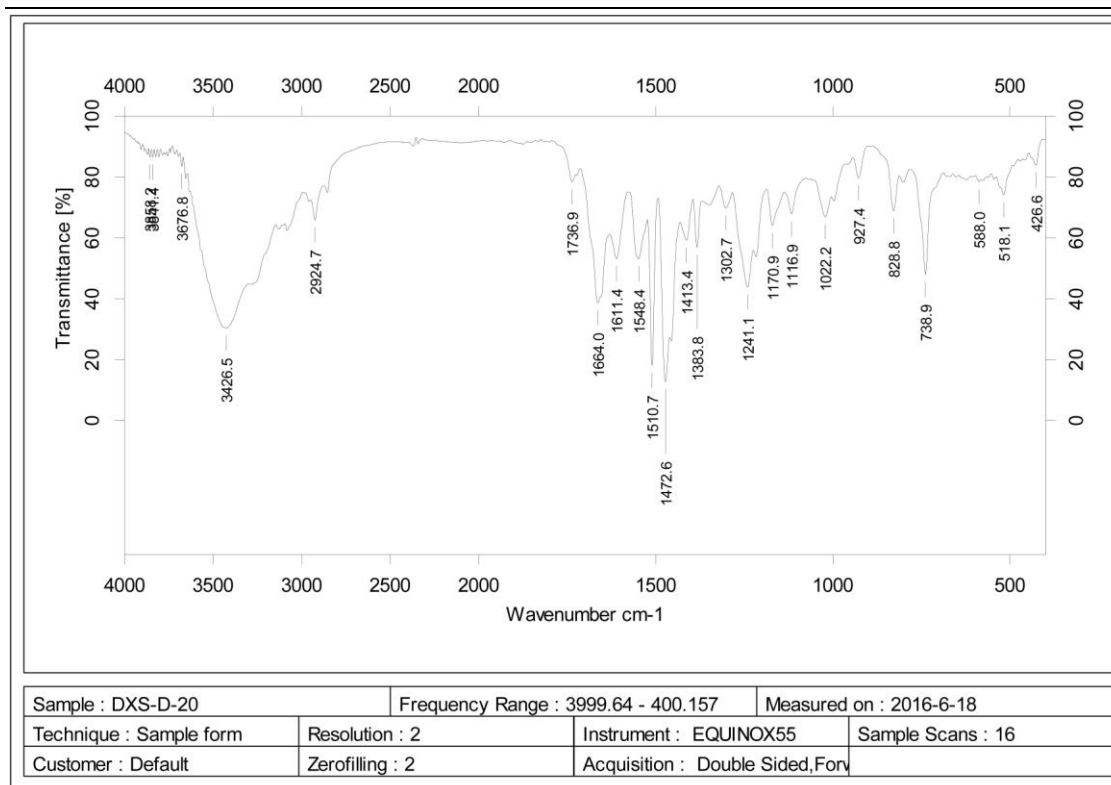

Figure S21. IR spectra of the target compound D05

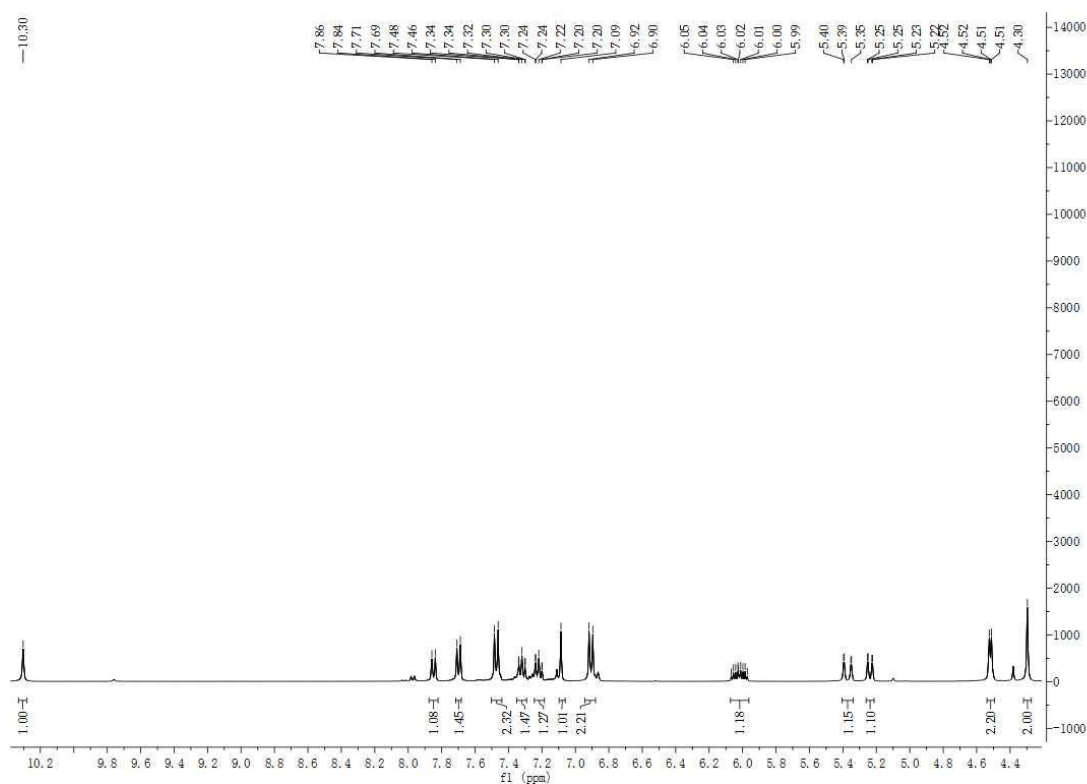

Figure S22. <sup>1</sup>H-NMR spectra of the target compound D05

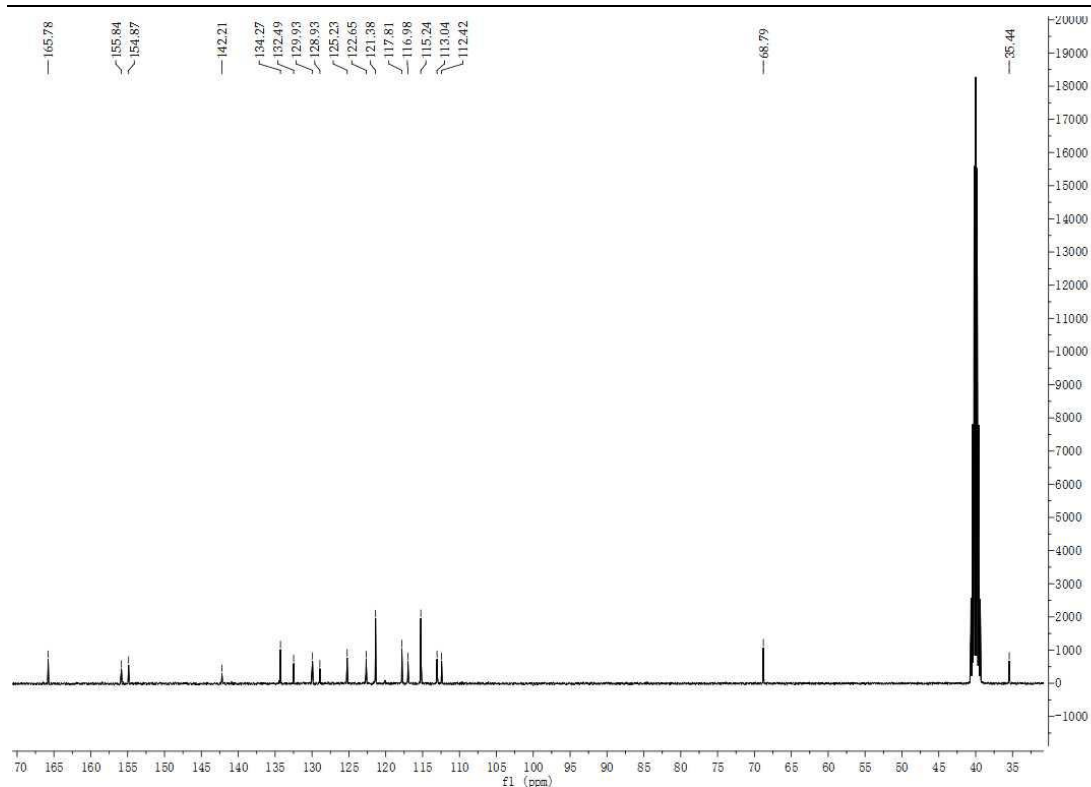

Figure S23.  $^{13}\text{C}$ -NMR spectra of the target compound D05

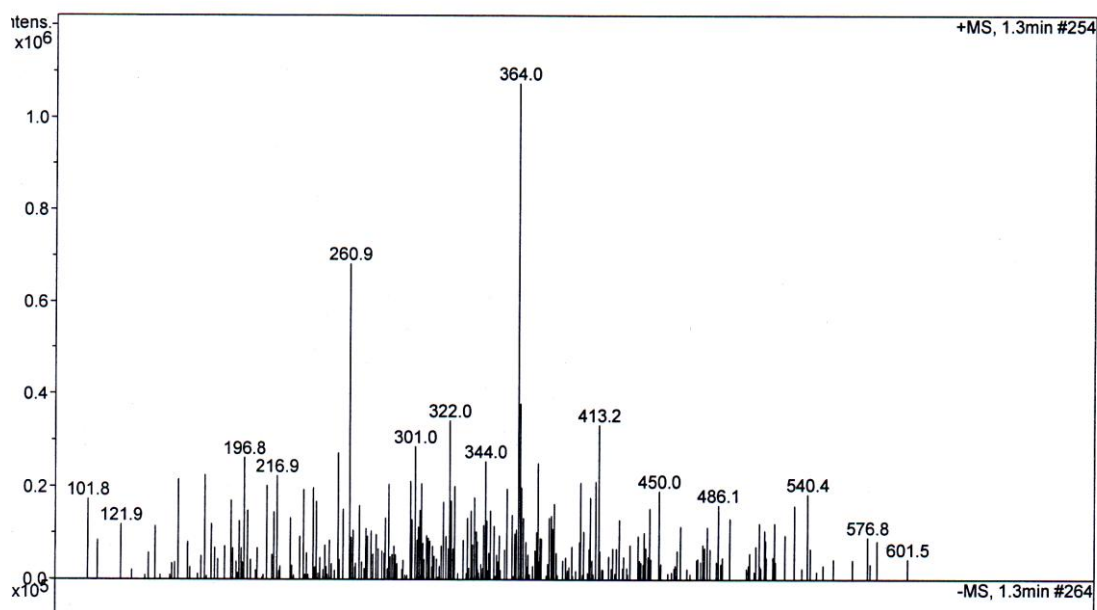

Figure S24. ESI-MS of the target compound D05

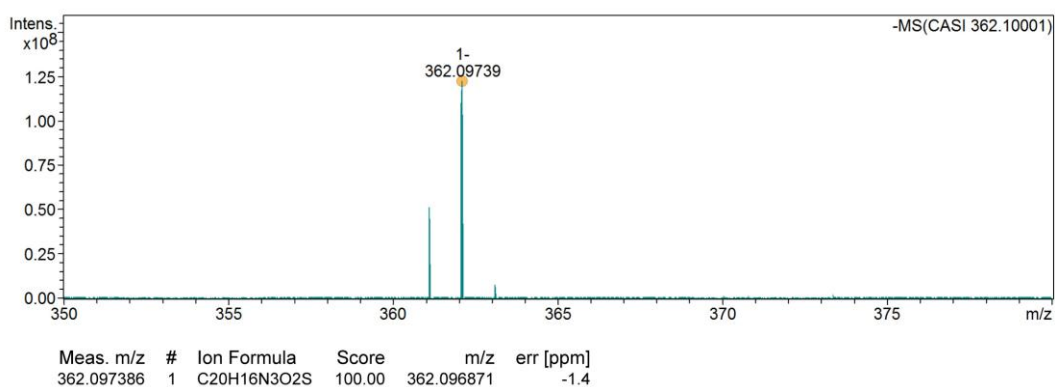

Figure S25. HRMS of the target compound D05

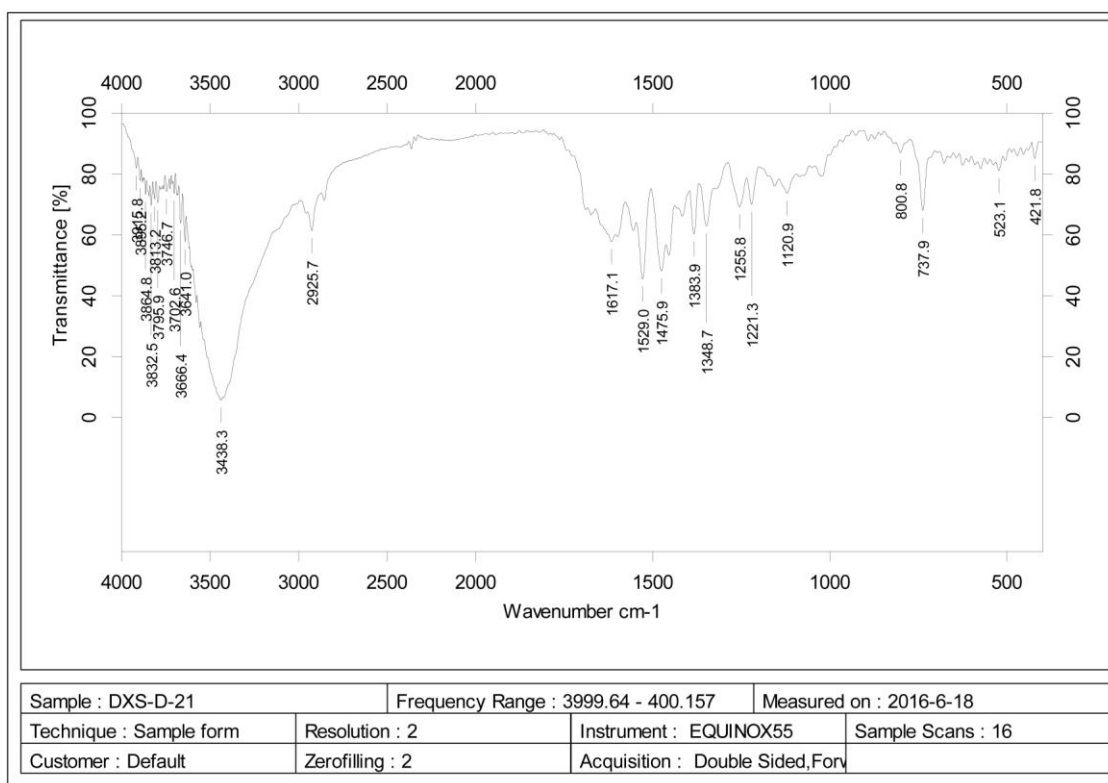

Figure S26. IR spectra of the target compound D06

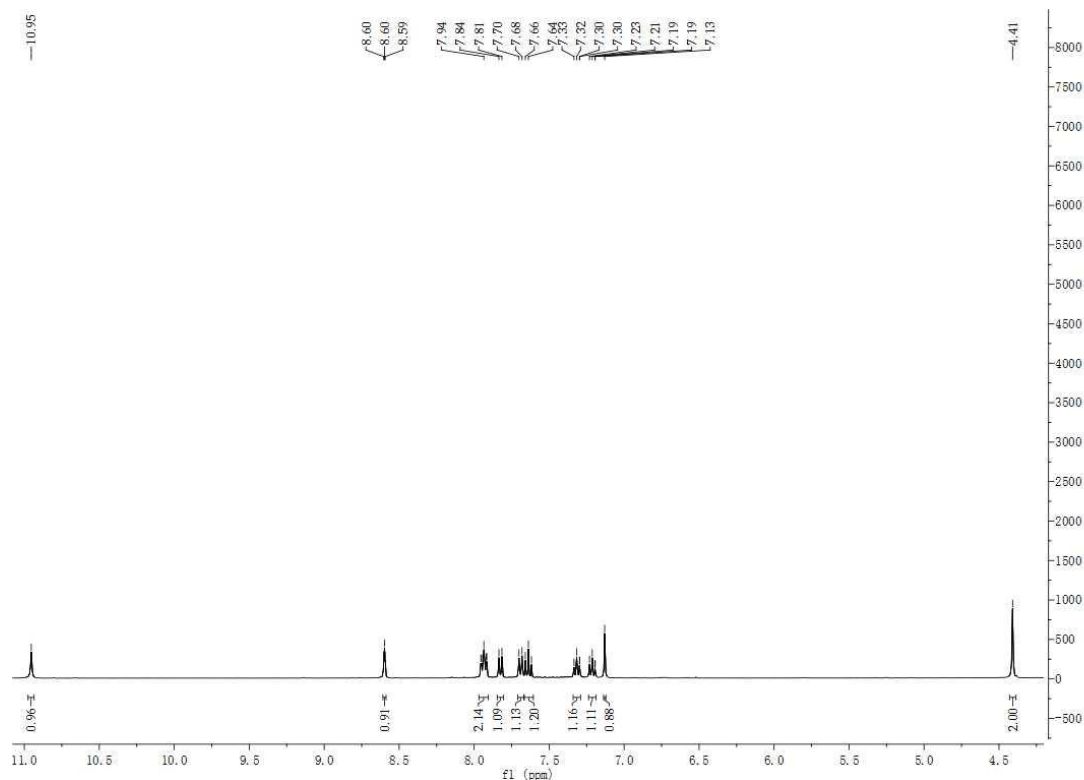

Figure S27.  $^1\text{H}$ -NMR spectra of the target compound D06

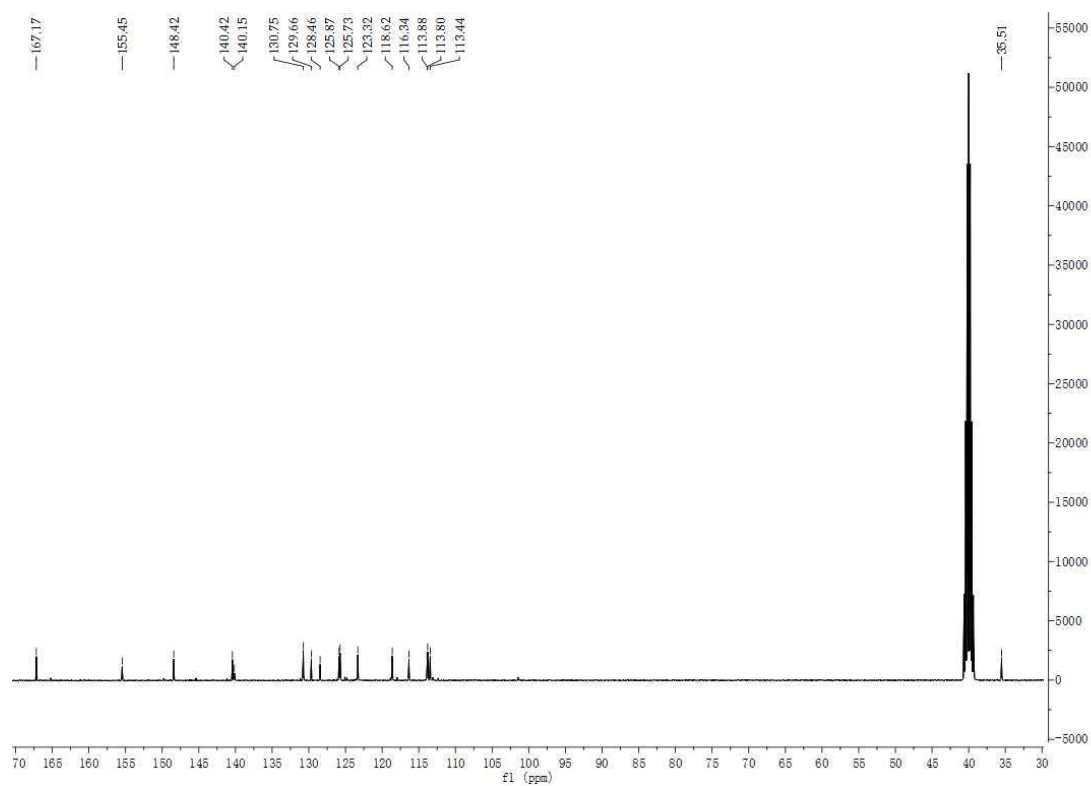

Figure S28.  $^{13}\text{C}$ -NMR spectra of the target compound D06

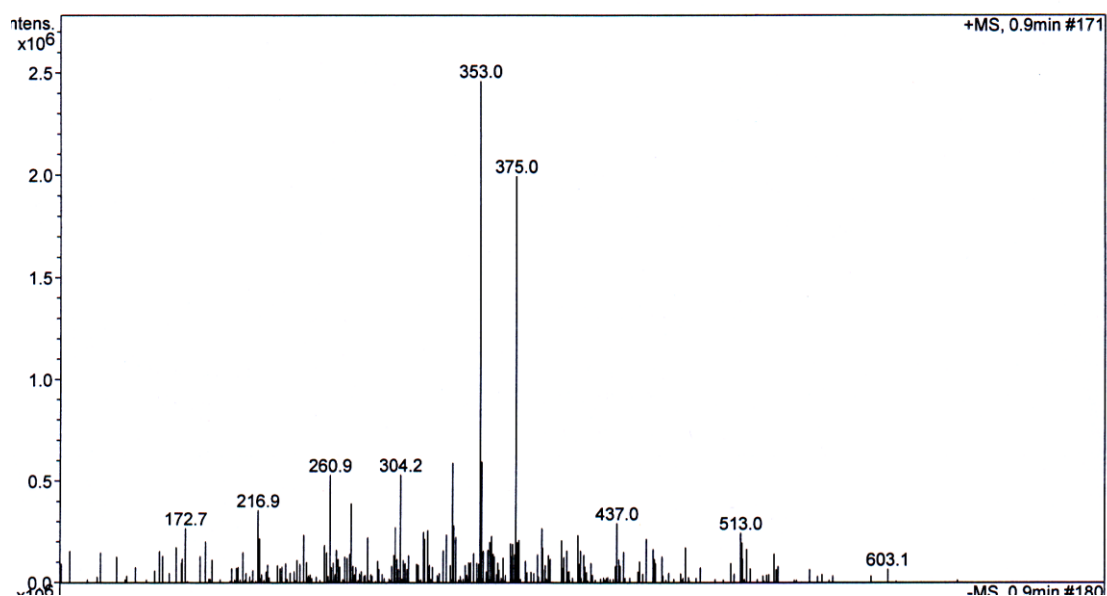

Figure S29. ESI-MS of the target compound D06

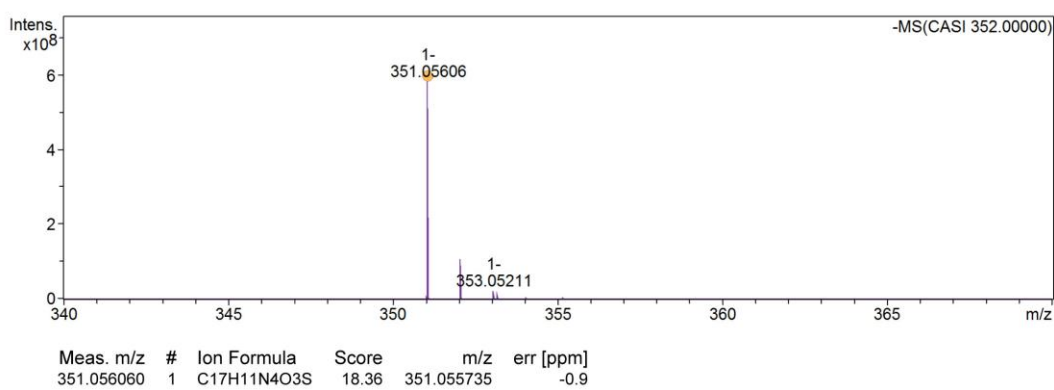

Figure S30. HRMS of the target compound D06



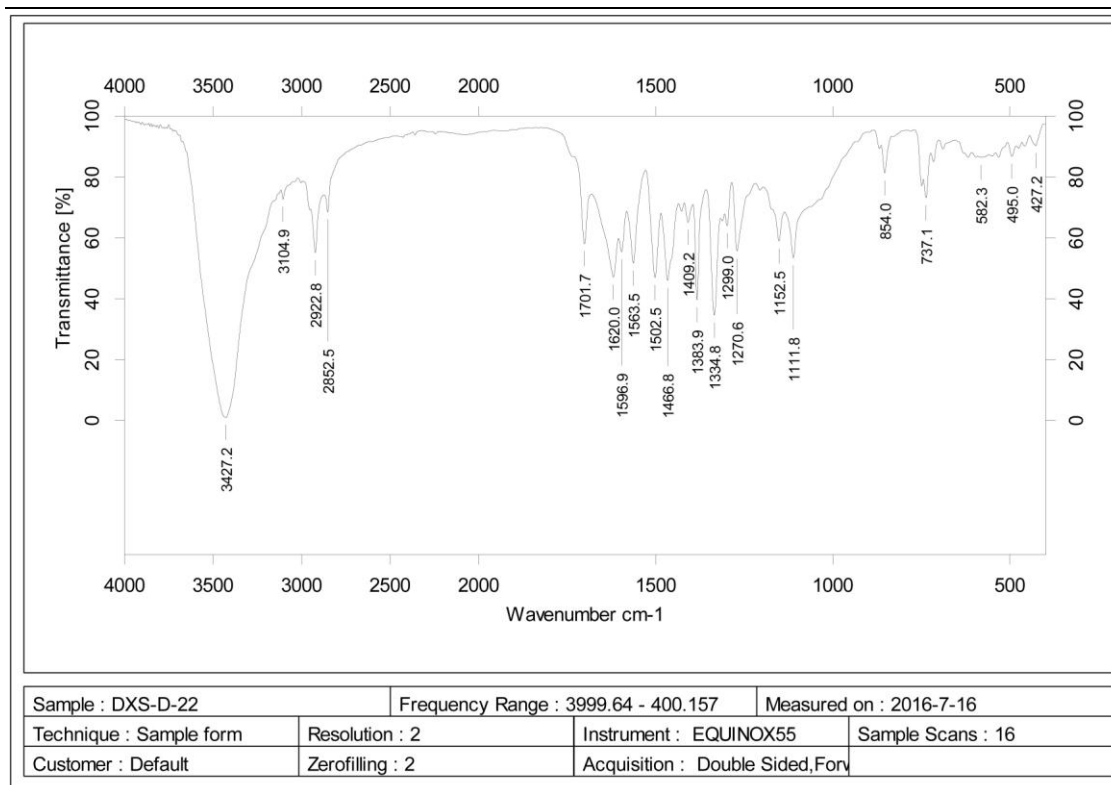

Figure S31. IR spectra of the target compound D07

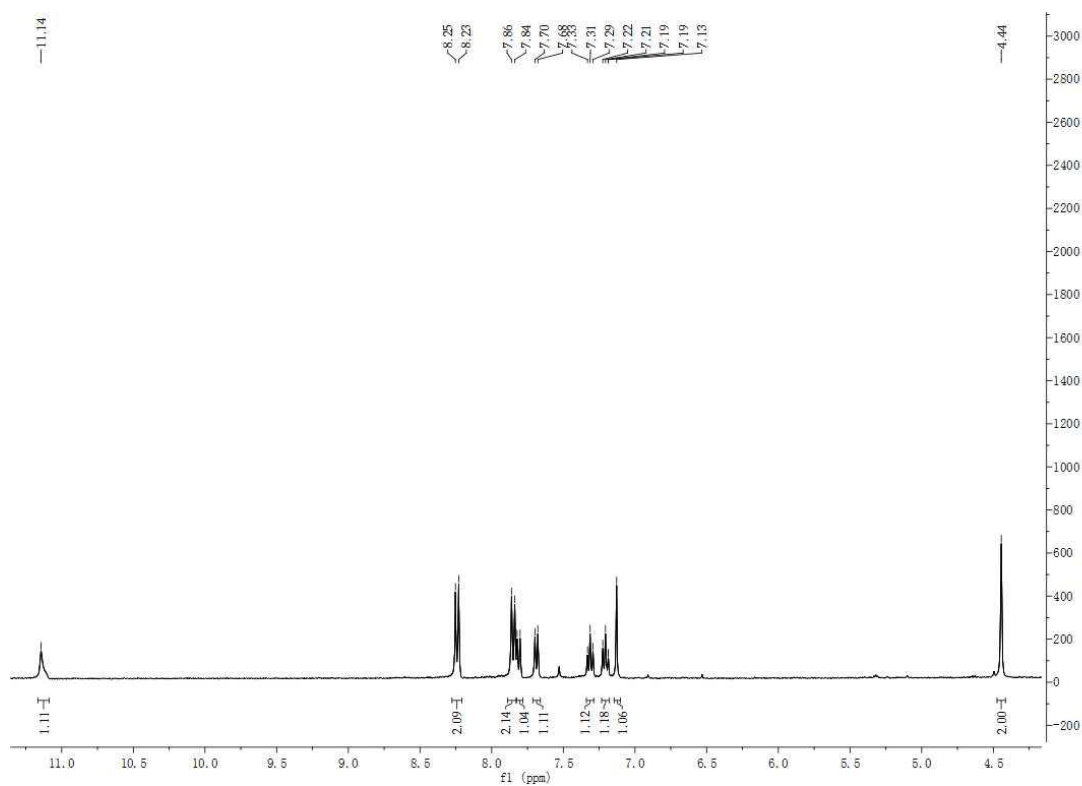

Figure S32. <sup>1</sup>H-NMR spectra of the target compound D07

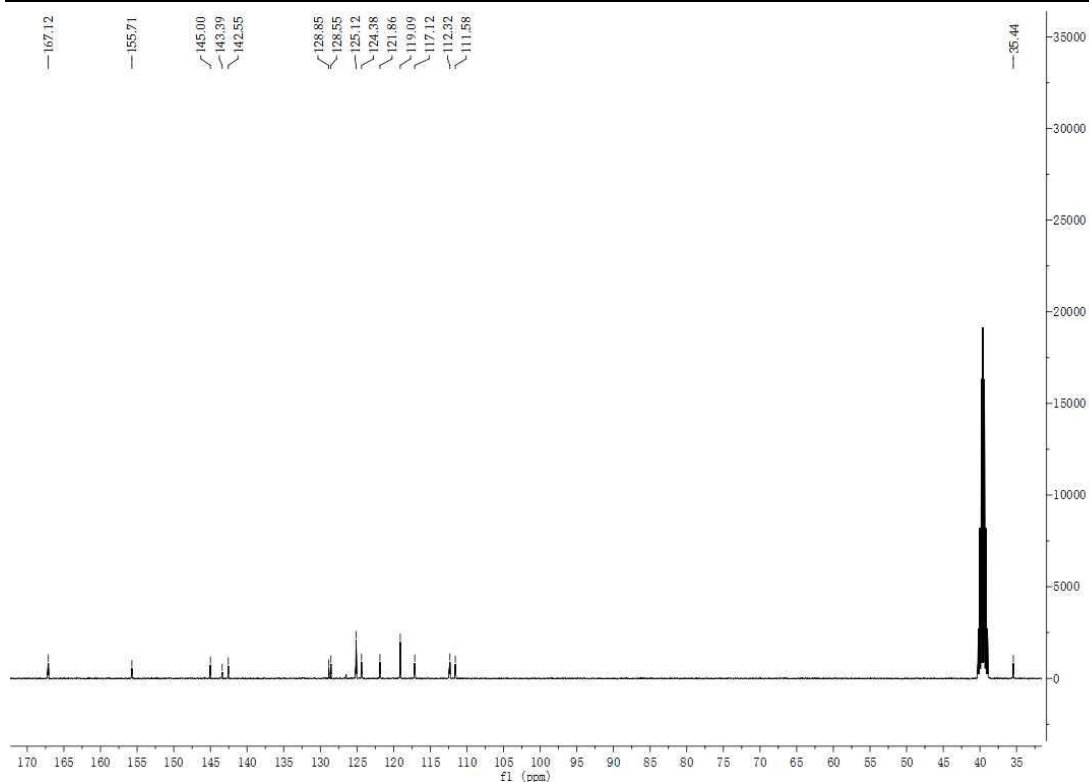

Figure S33.  $^{13}\text{C}$ -NMR spectra of the target compound D07

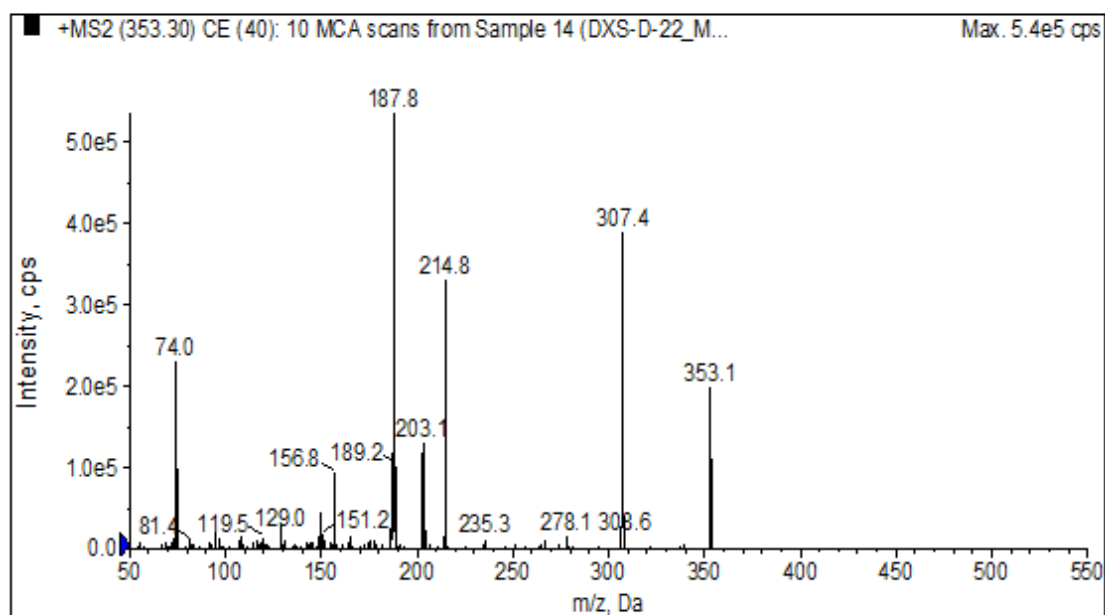

Figure S34. ESI-MS of the target compound D07

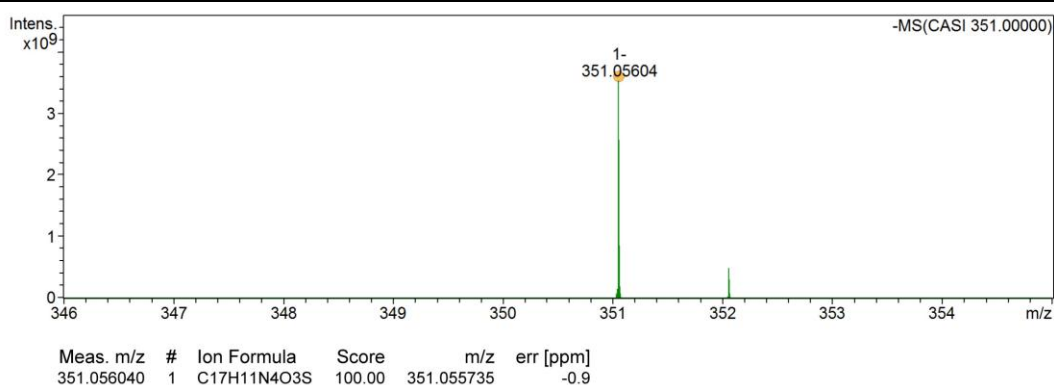

Figure S35. HRMS of the target compound D07

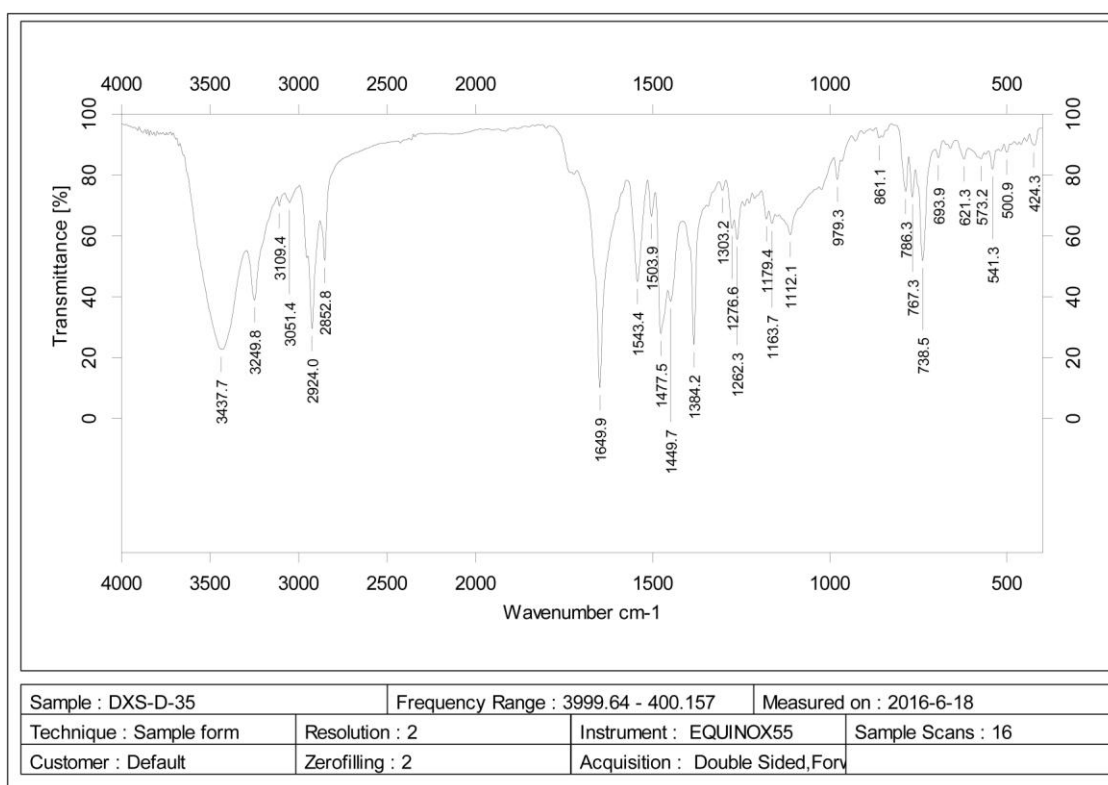

Figure S36. IR spectra of the target compound D08

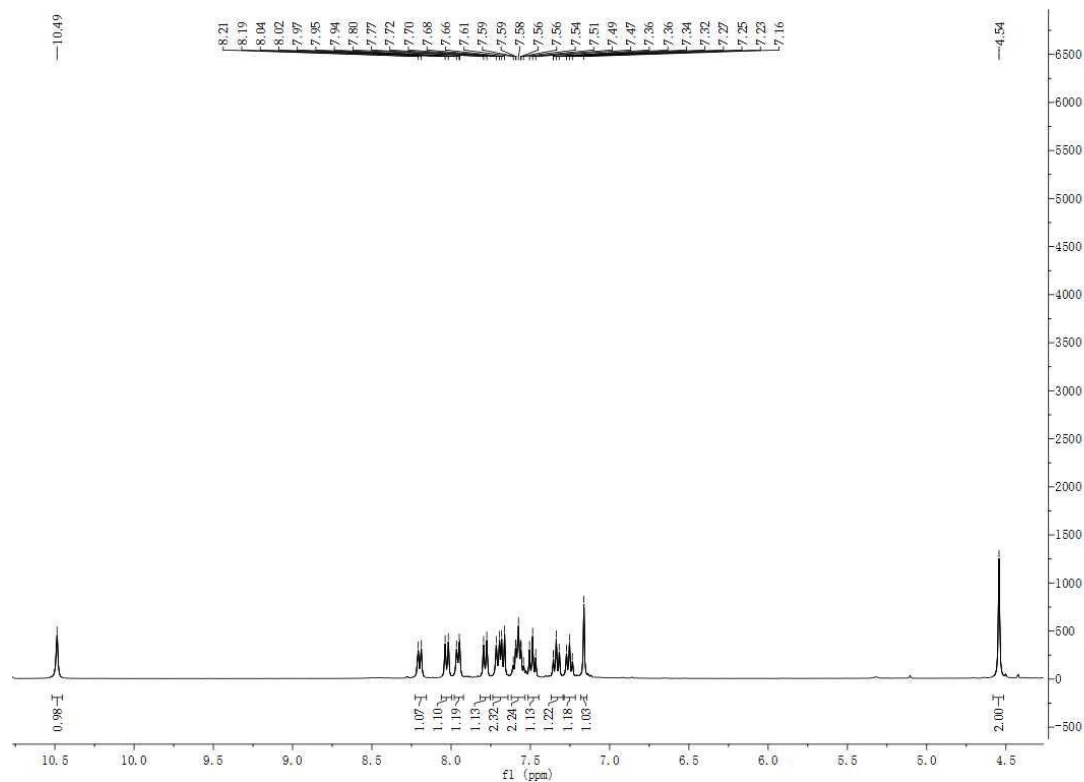

Figure S37.  $^1\text{H}$ -NMR spectra of the target compound D08

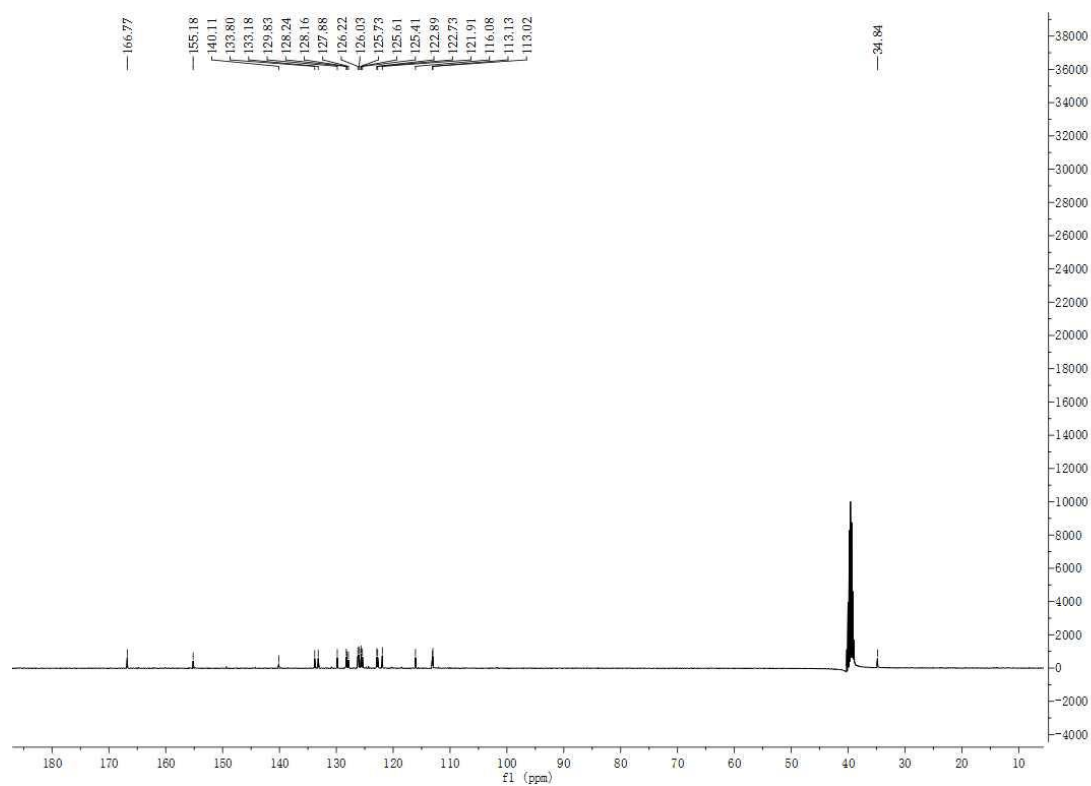

Figure S38.  $^{13}\text{C}$ -NMR spectra of the target compound D08

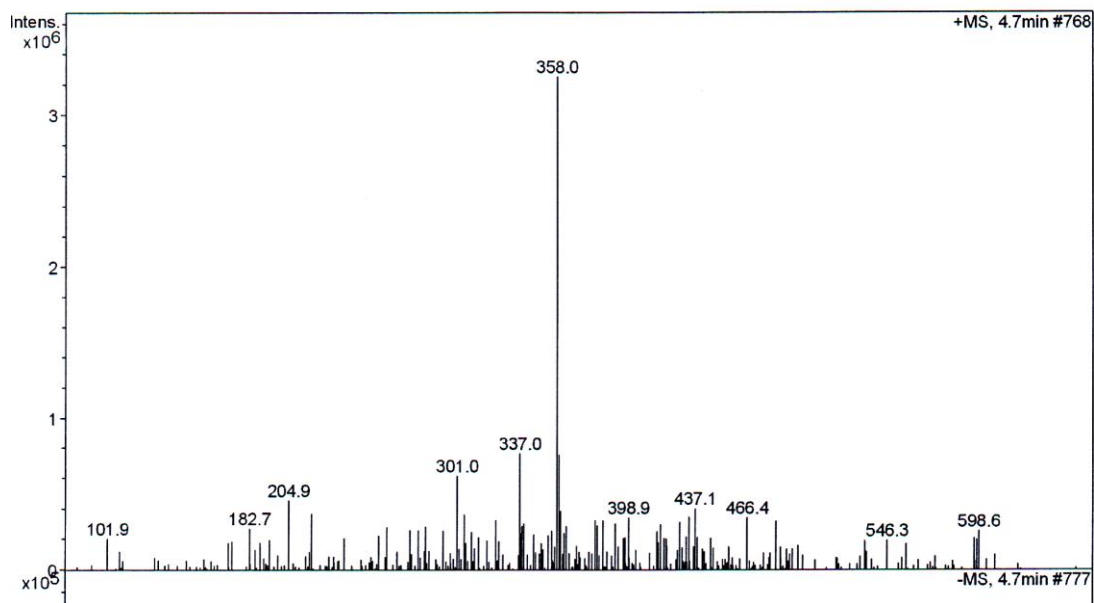

Figure S39. ESI-MS of the target compound D08

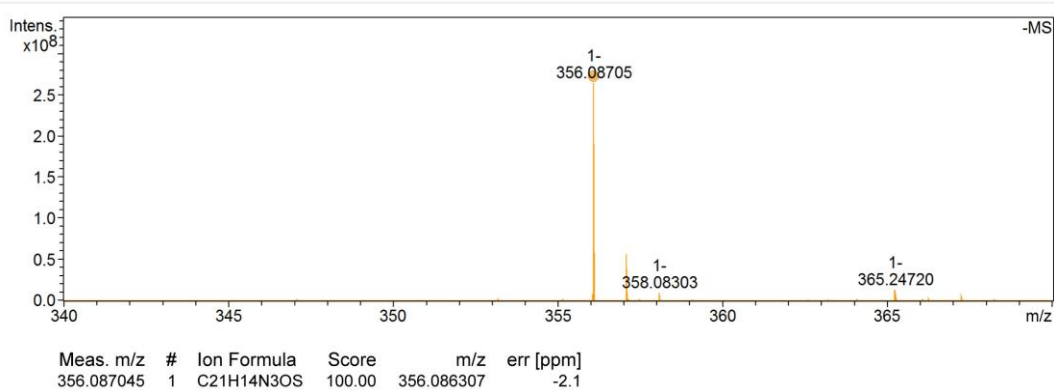

Figure S40. HRMS of the target compound D08

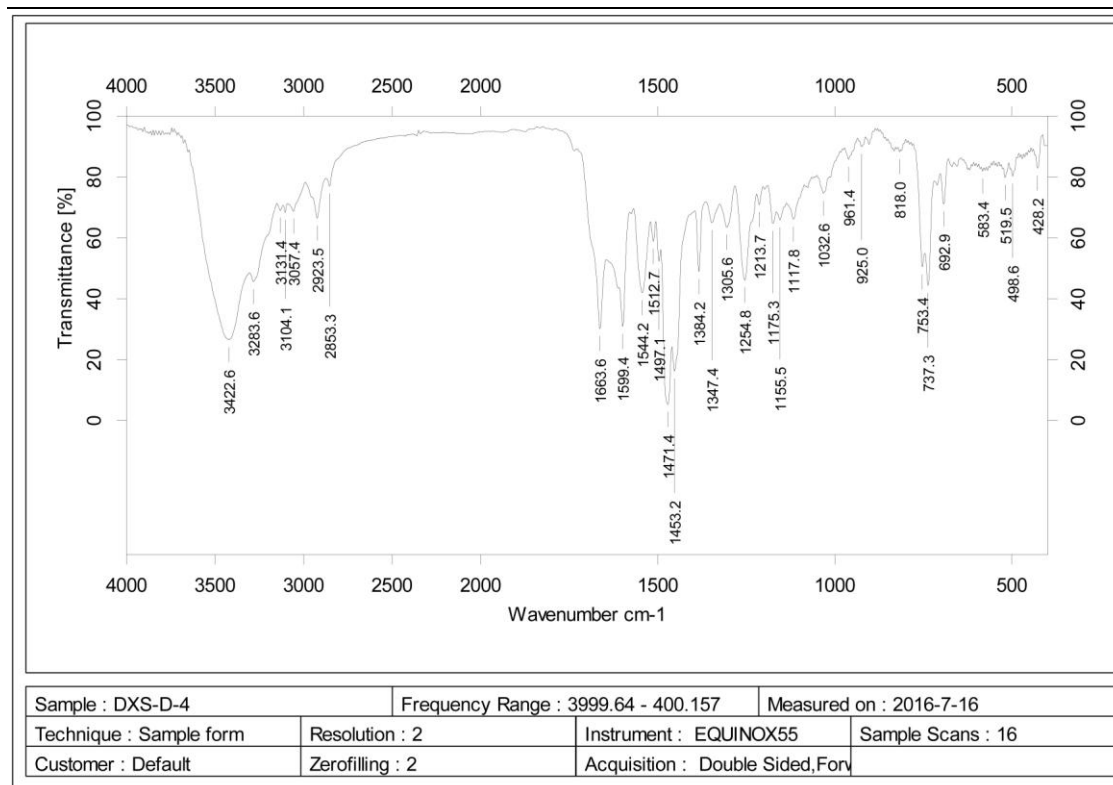

Figure S41. IR spectra of the target compound D09

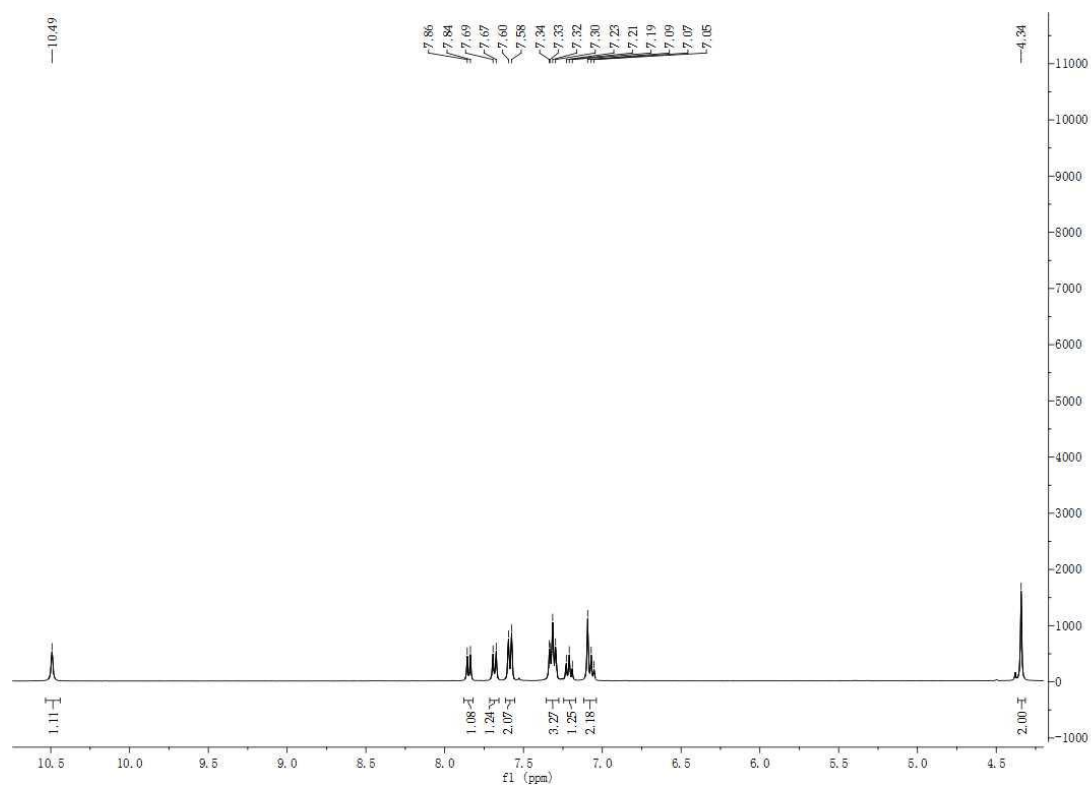

Figure S42. <sup>1</sup>H-NMR spectra of the target compound D09

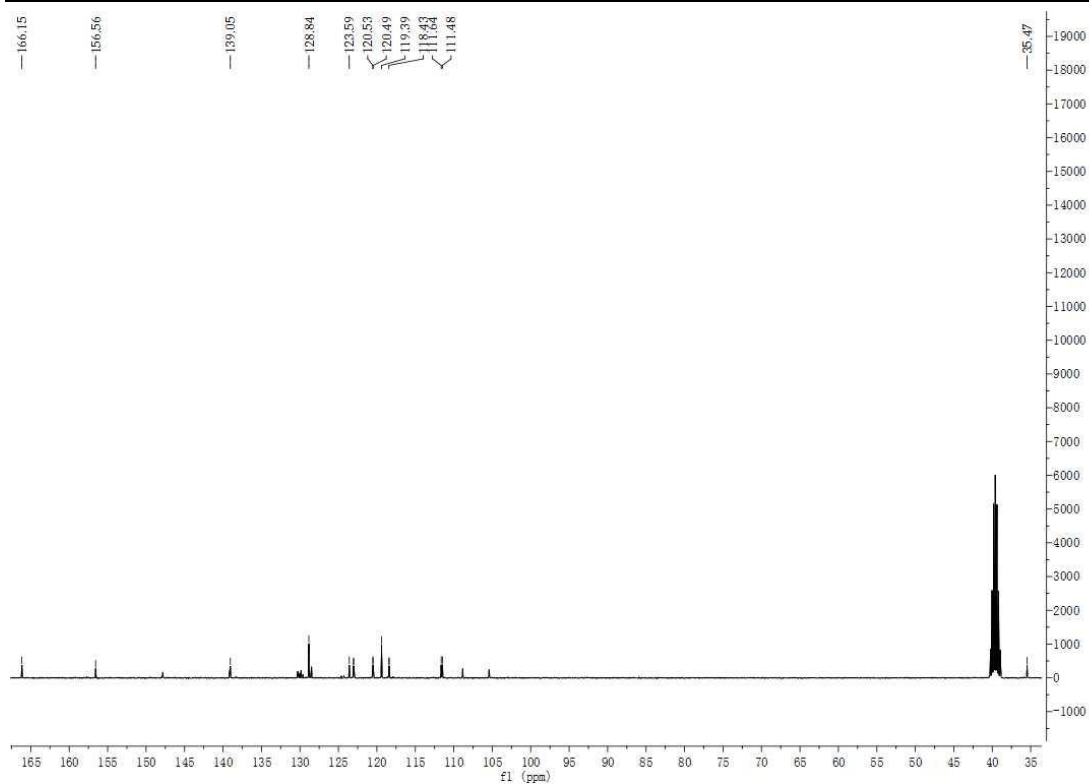

Figure S43.  $^{13}\text{C}$ -NMR spectra of the target compound D09

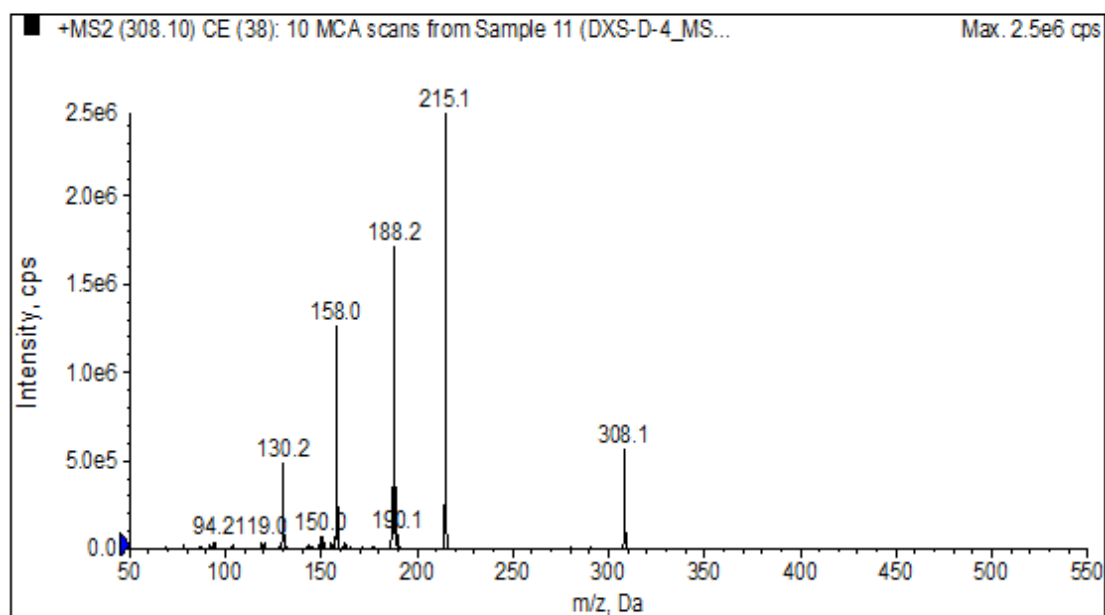

Figure S44. ESI-MS of the target compound D09

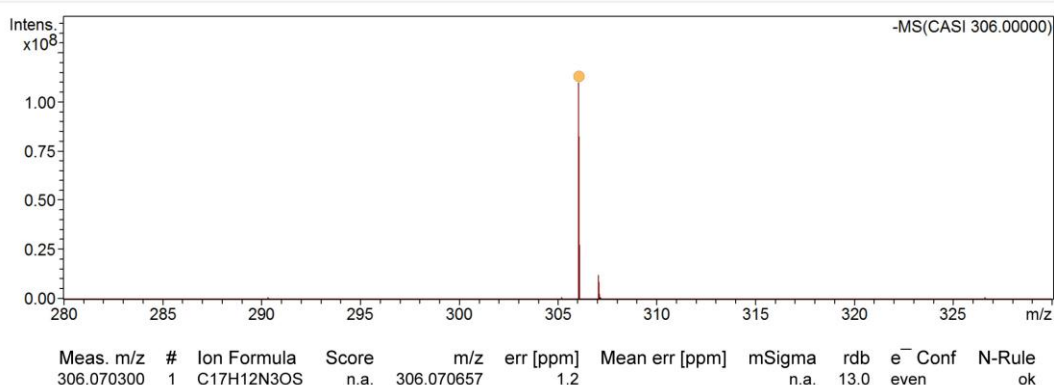

Figure S45. HRMS of the target compound D09

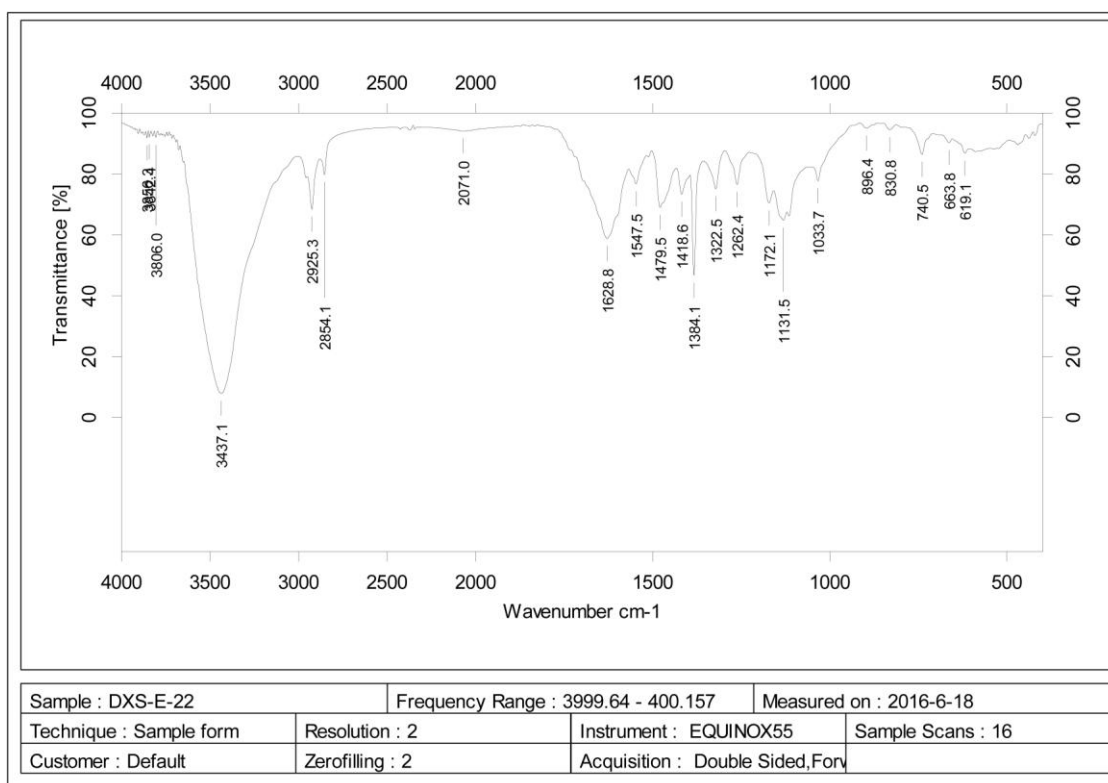

Figure S46. IR spectra of the target compound D10



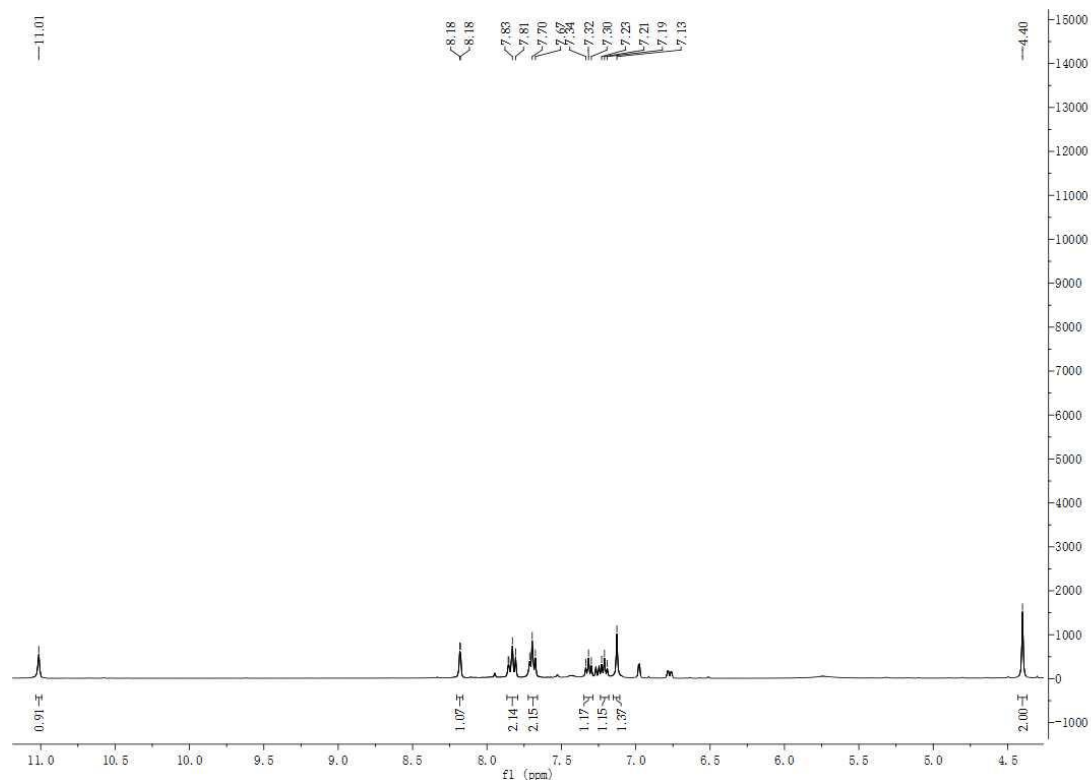

Figure S47. <sup>1</sup>H-NMR spectra of the target compound D10

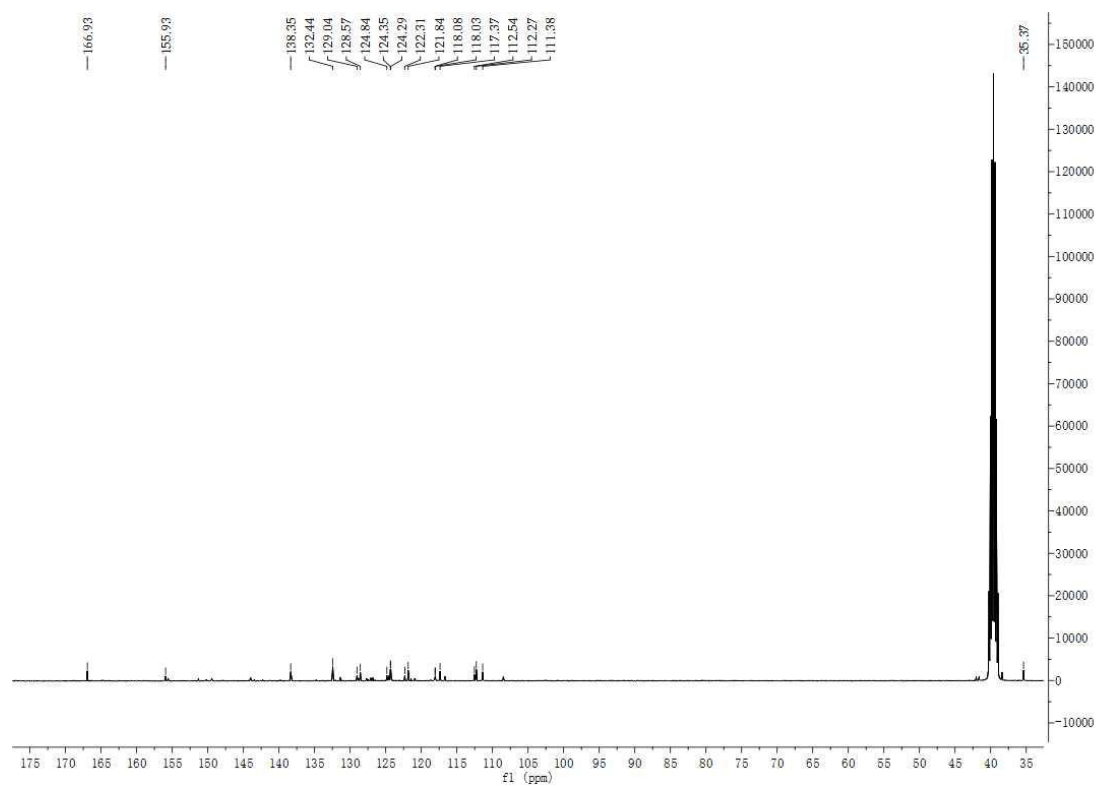

Figure S48. <sup>13</sup>C-NMR spectra of the target compound D10

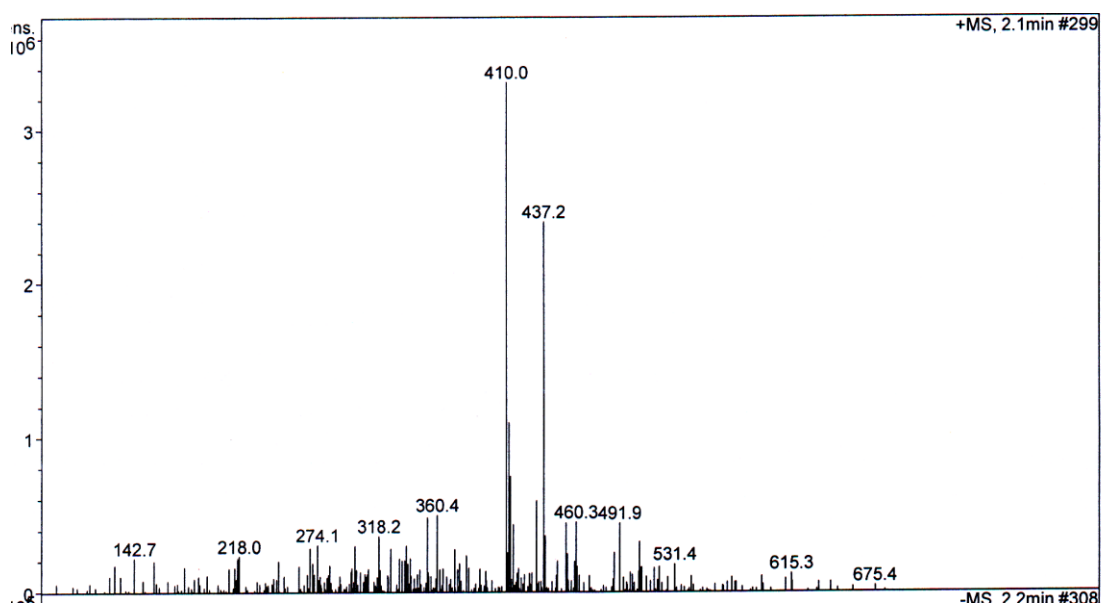

Figure S49. ESI-MS of the target compound D10

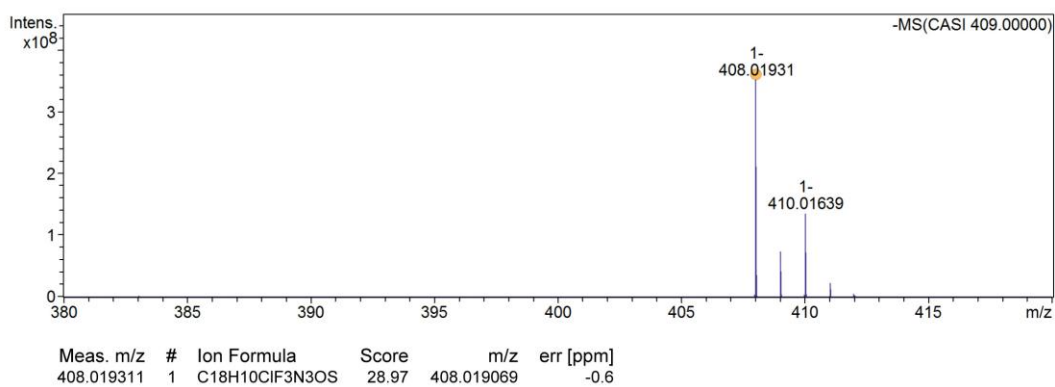

Figure S50. HRMS of the target compound D10

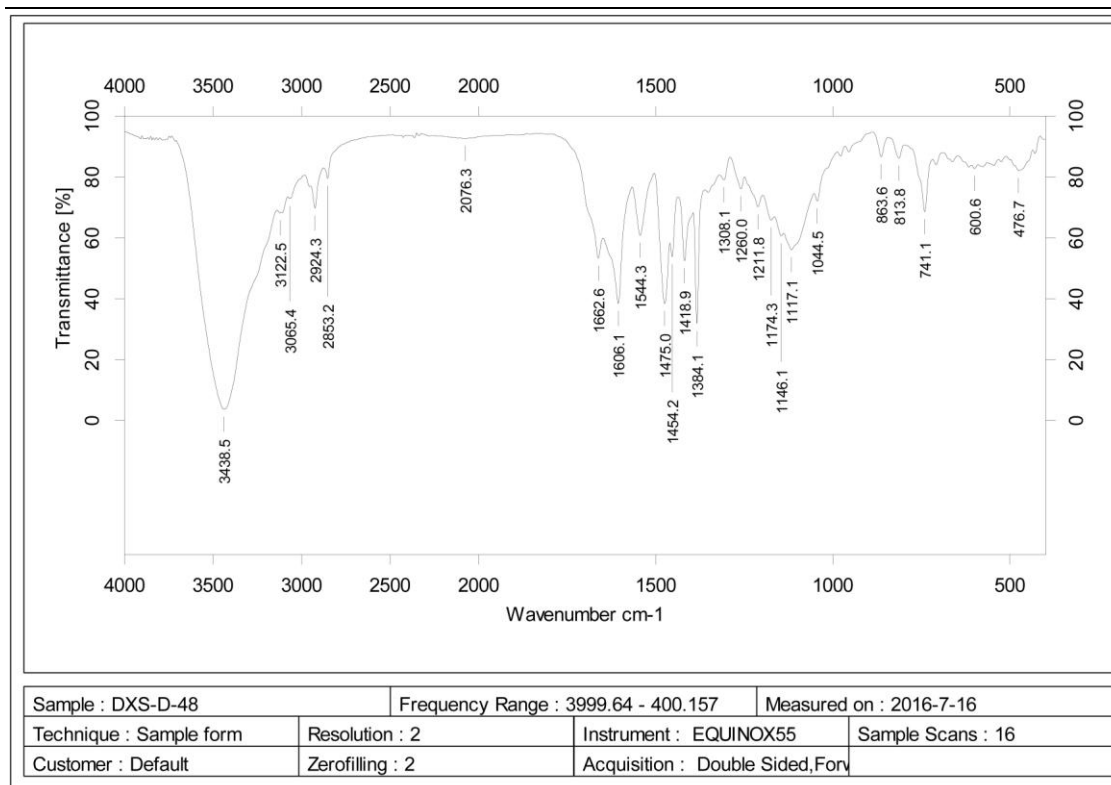

Figure S51. IR spectra of the target compound D11

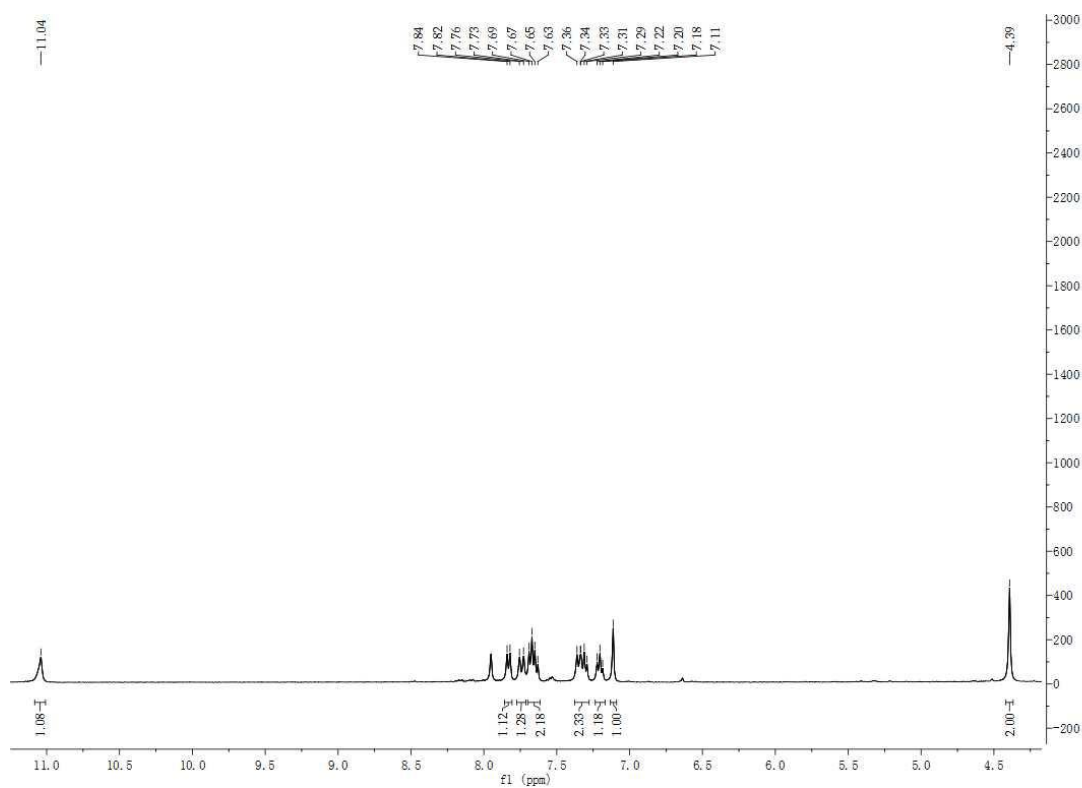

Figure S52. <sup>1</sup>H-NMR spectra of the target compound D11

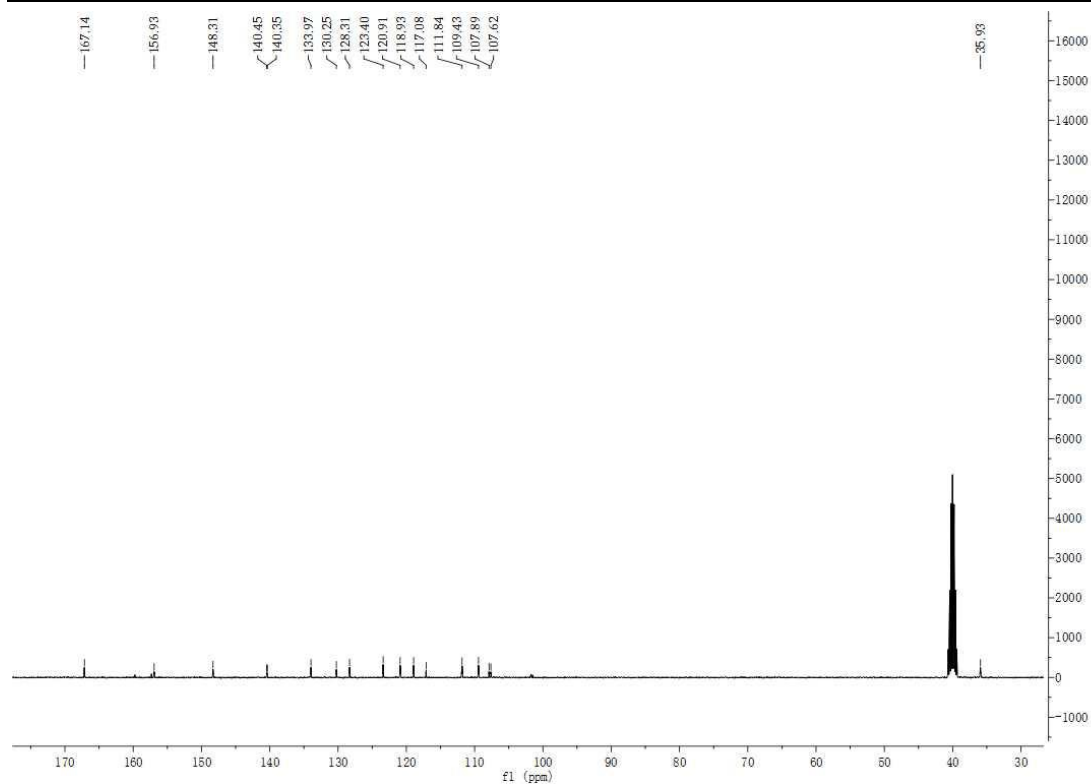

Figure S53.  $^{13}\text{C}$ -NMR spectra of the target compound D11

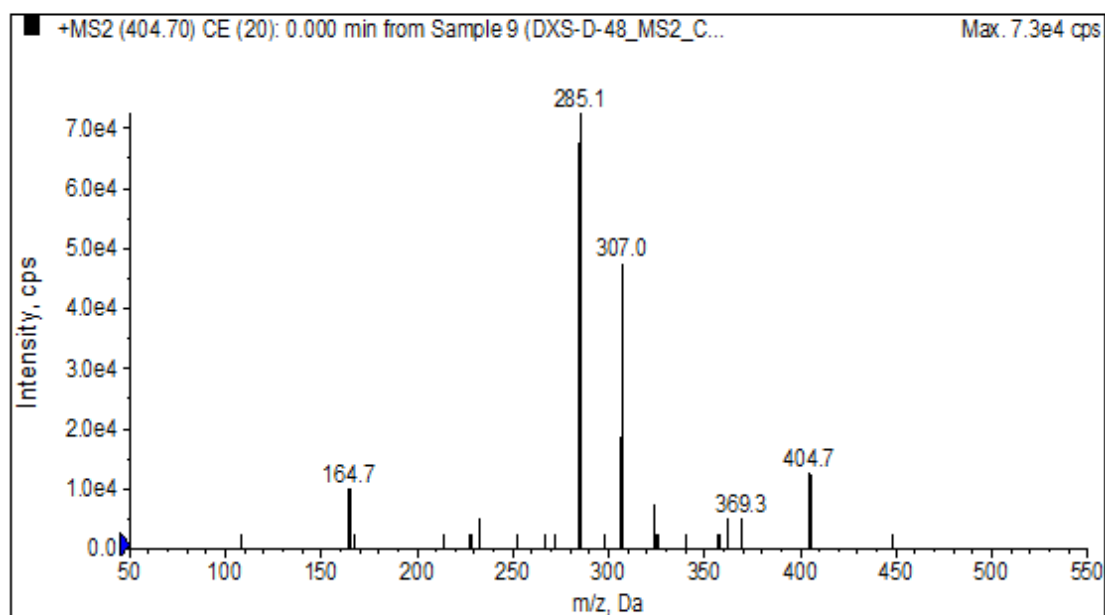

Figure S54. ESI-MS of the target compound D11

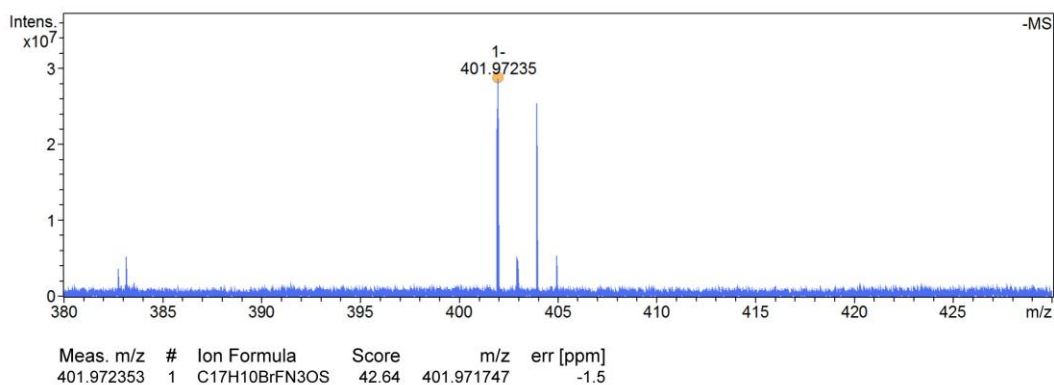

Figure S55. HRMS of the target compound D11

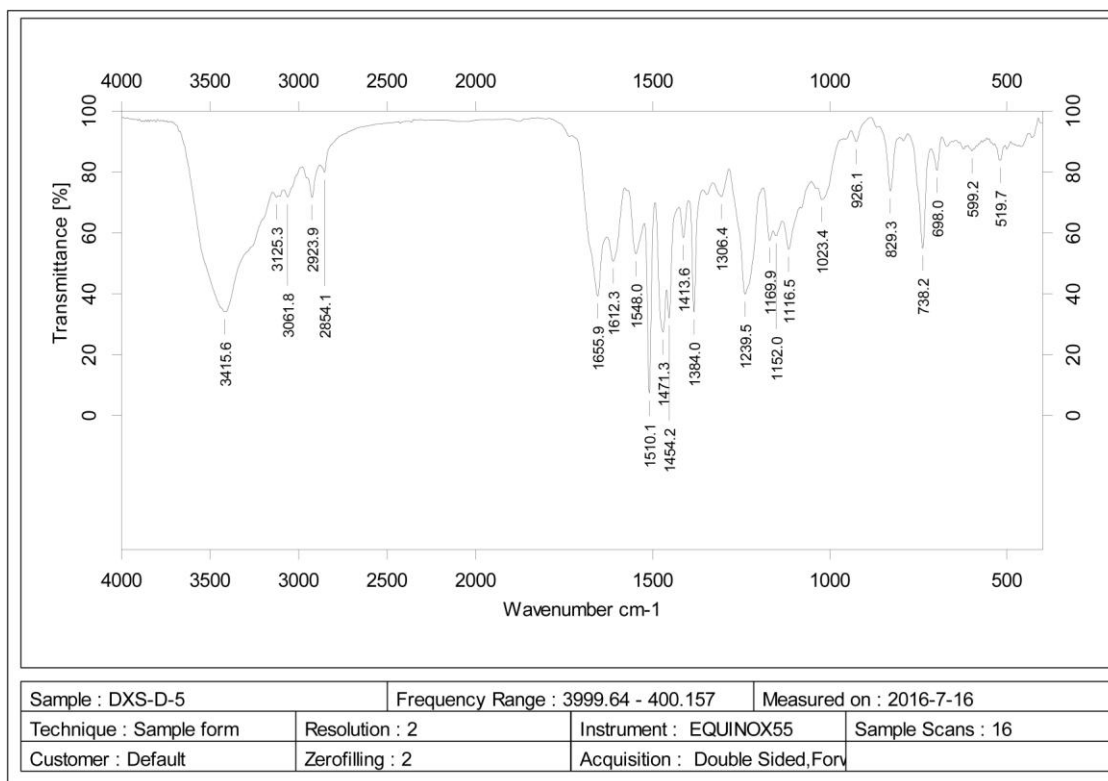

Figure S56. IR spectra of the target compound D12

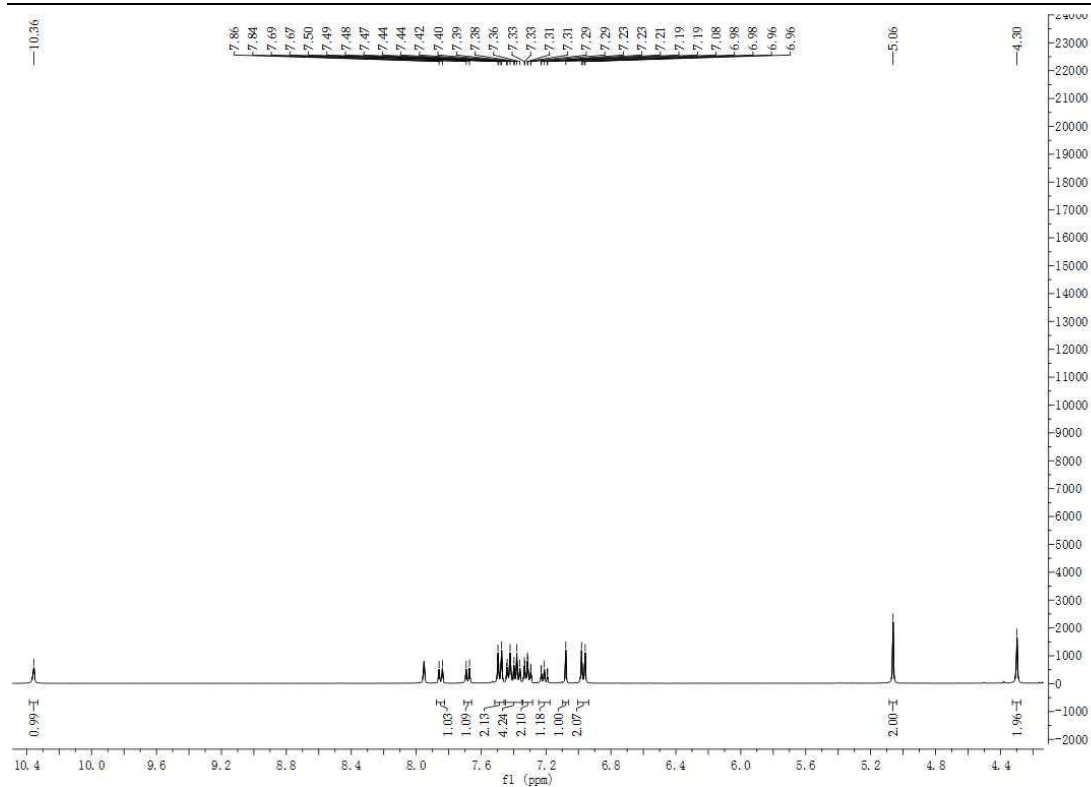

Figure S57.  $^1\text{H-NMR}$  spectra of the target compound D12

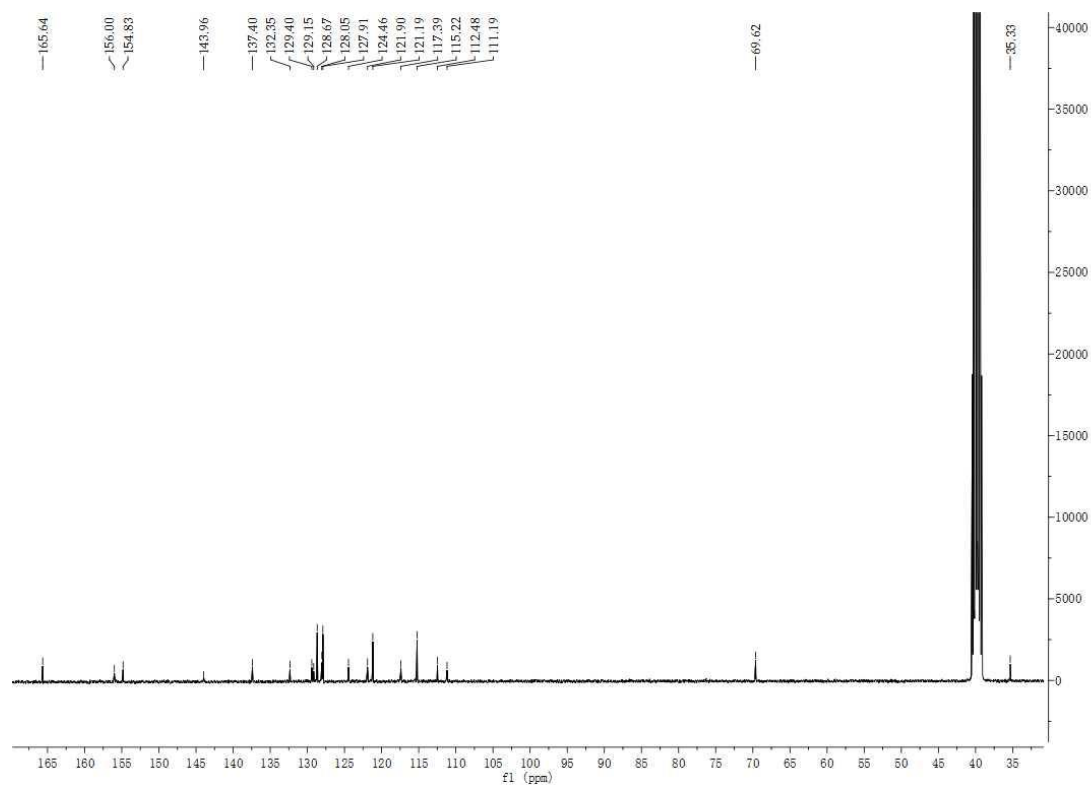

Figure S58.  $^{13}\text{C-NMR}$  spectra of the target compound D12

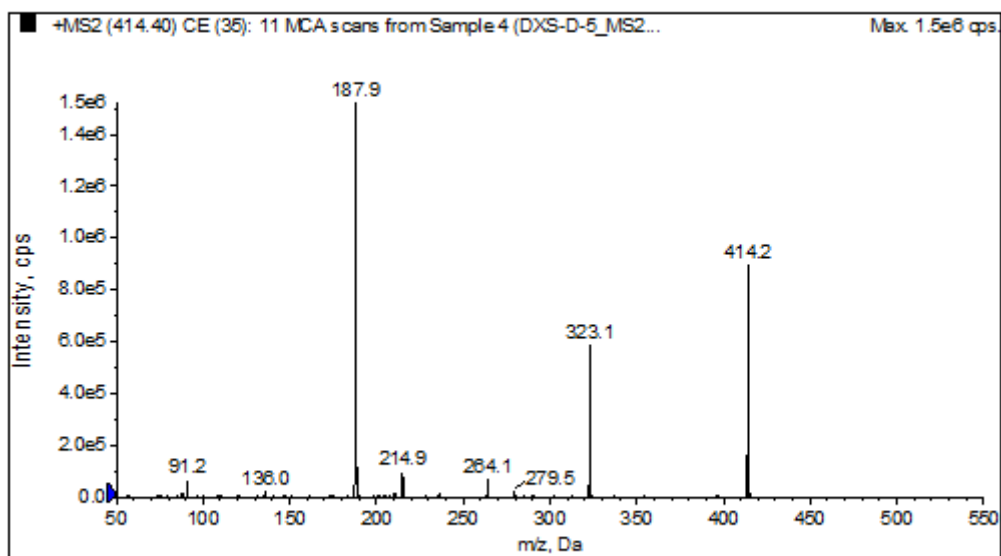

Figure S59. ESI-MS of the target compound D12

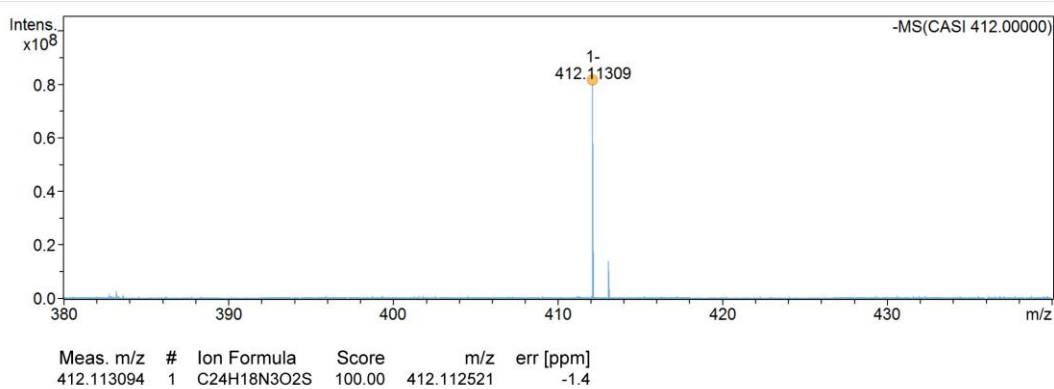

Figure S60. HRMS of the target compound D12

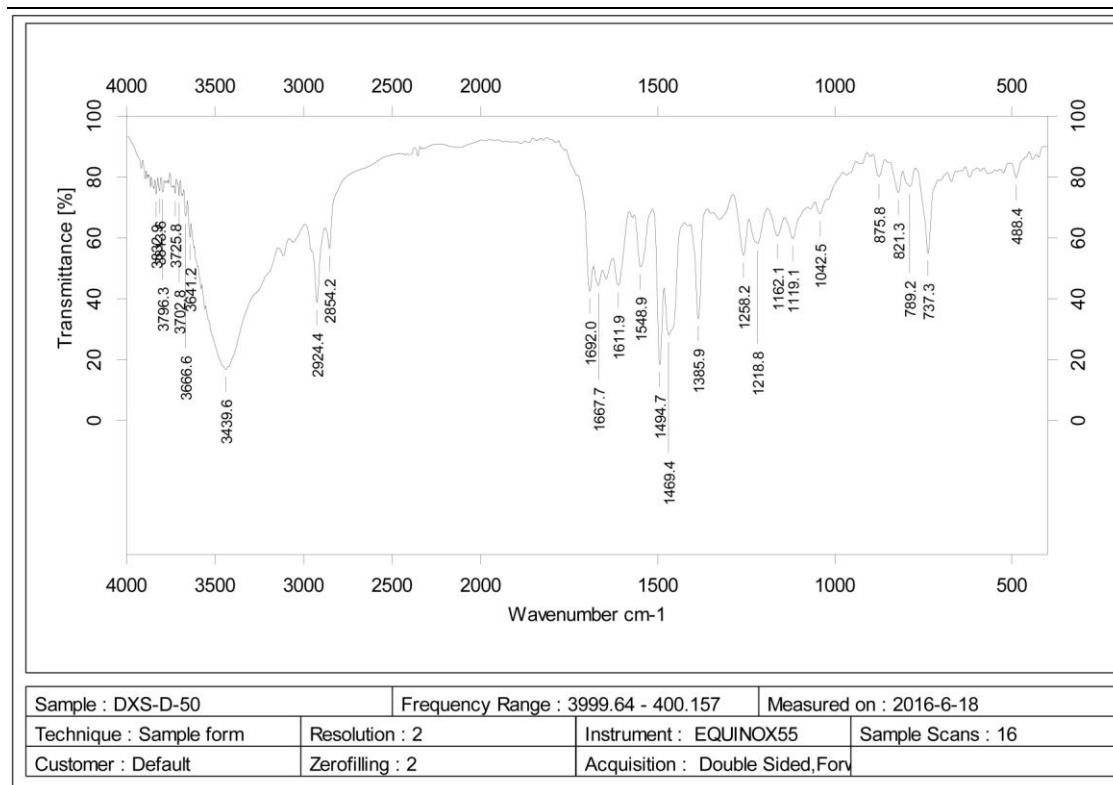

Figure S61. IR spectra of the target compound D13

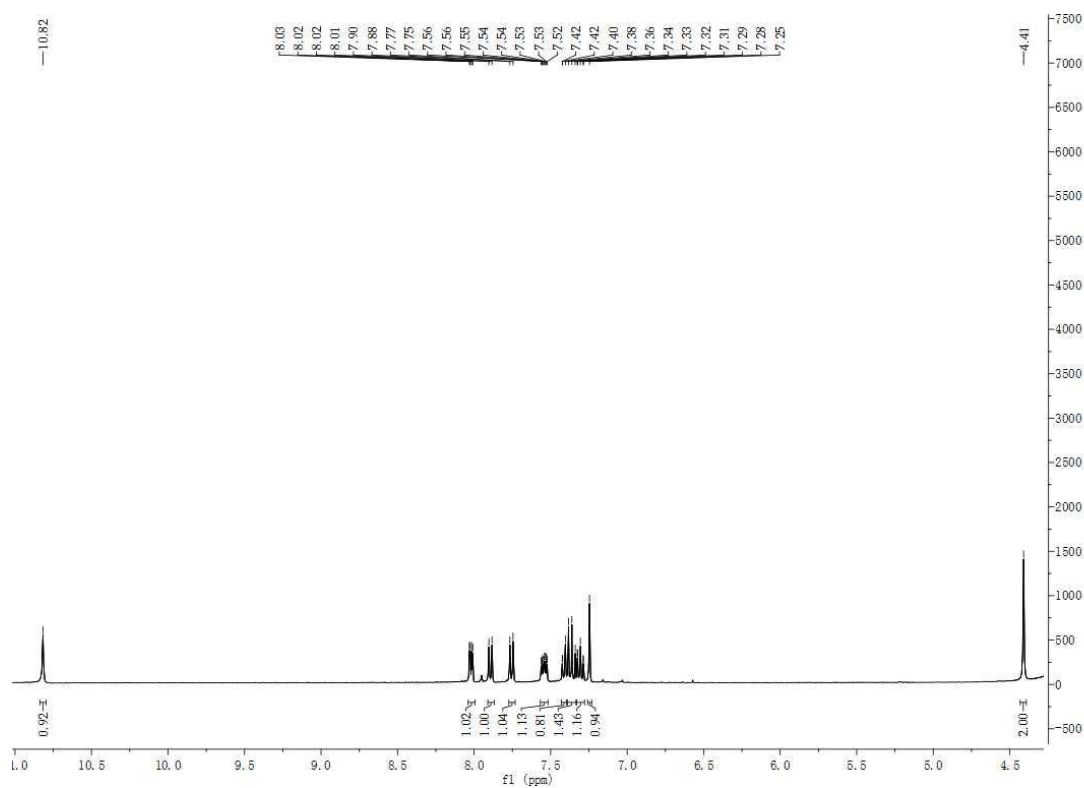

Figure S62. <sup>1</sup>H-NMR spectra of the target compound D13



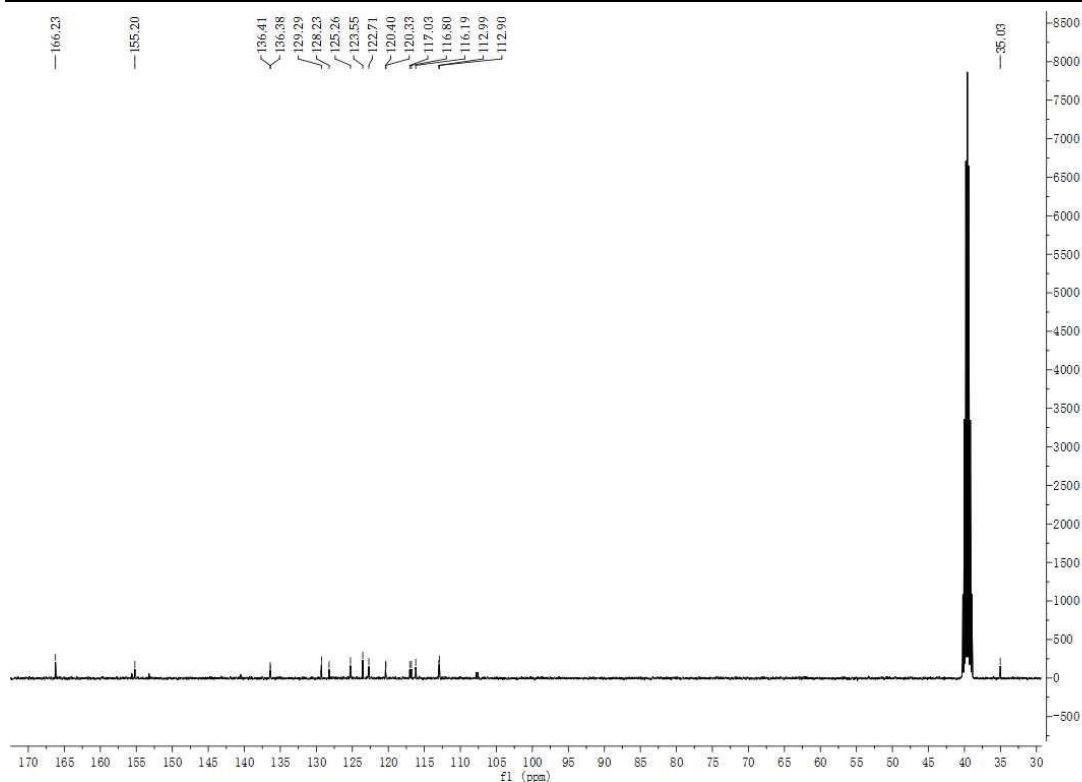

Figure S63.  $^{13}\text{C}$ -NMR spectra of the target compound D13

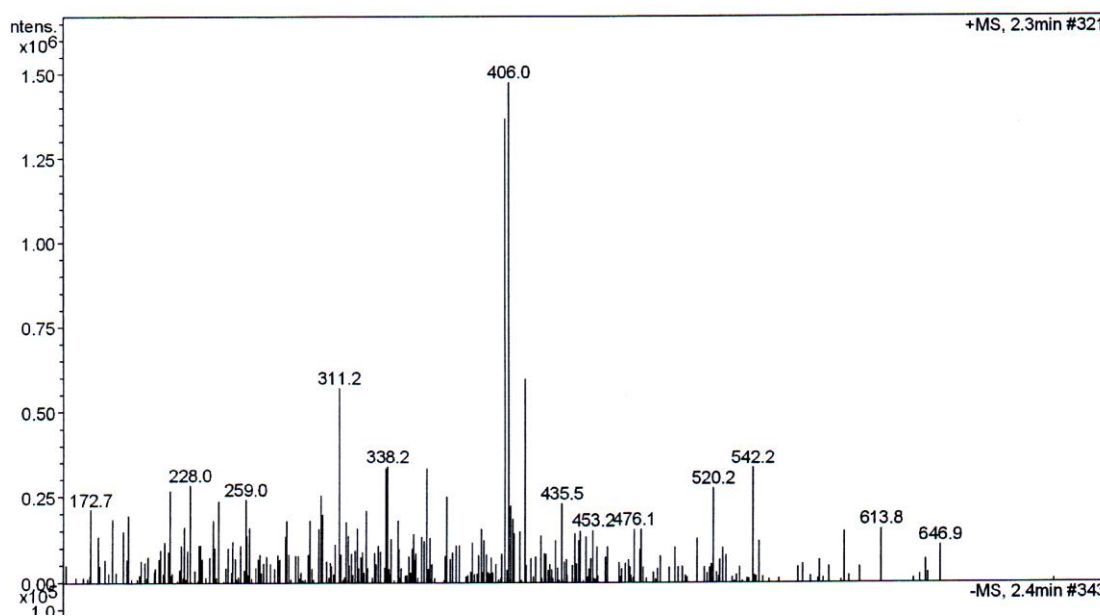

Figure S64. ESI-MS of the target compound D13

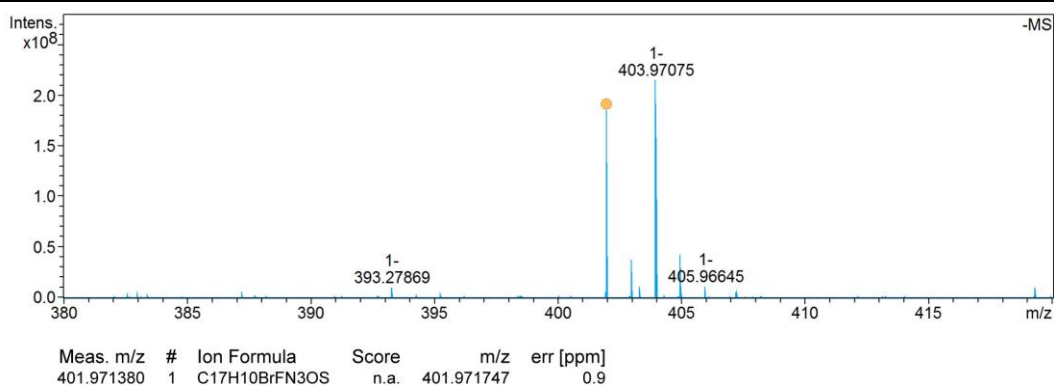

Figure S65. HRMS of the target compound D13

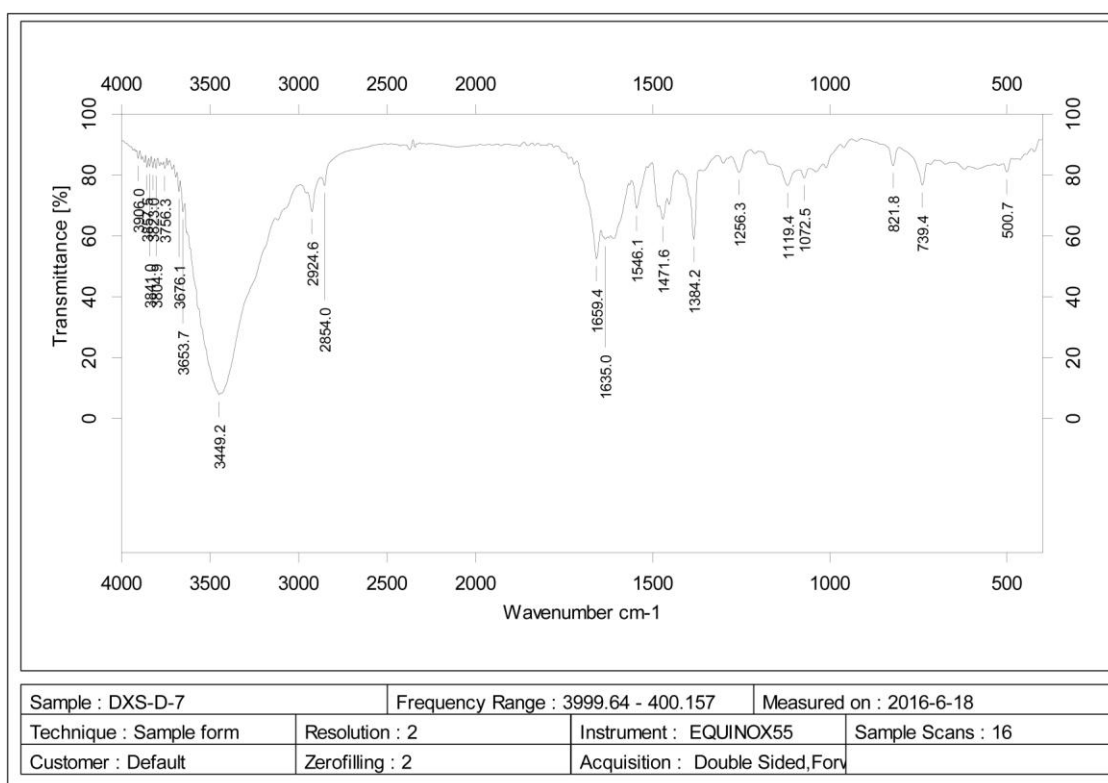

Figure S66. IR spectra of the target compound D14

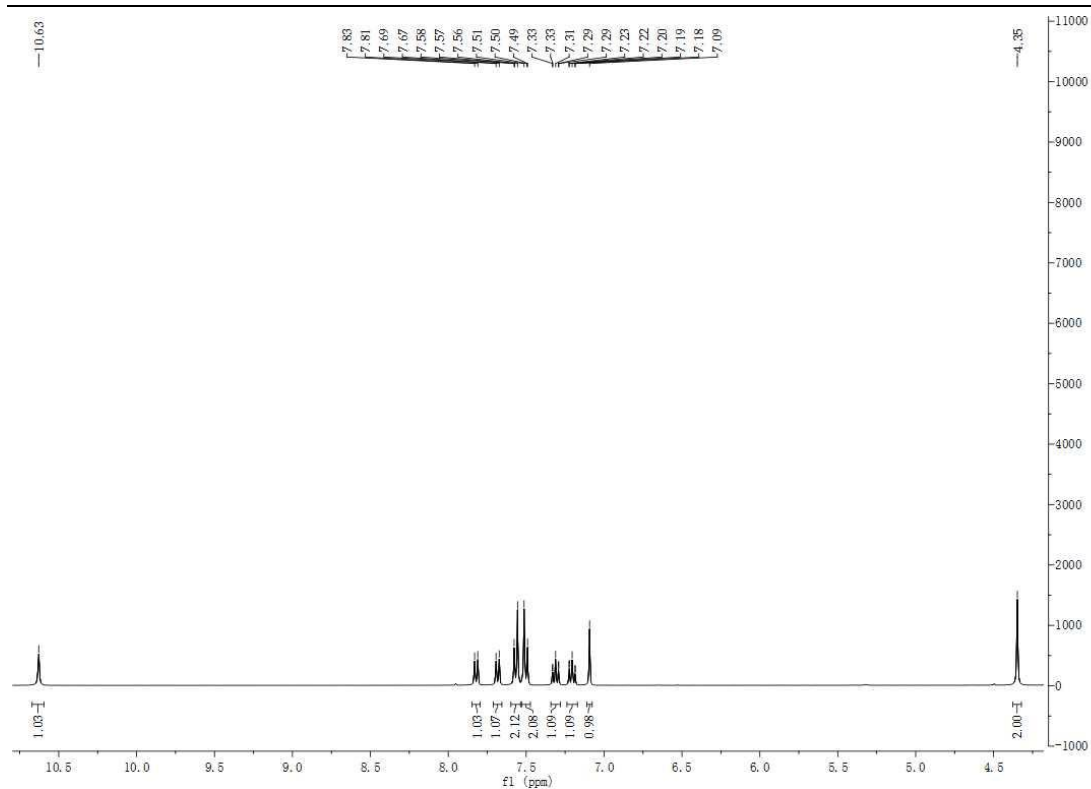

Figure S67. <sup>1</sup>H-NMR spectra of the target compound D14

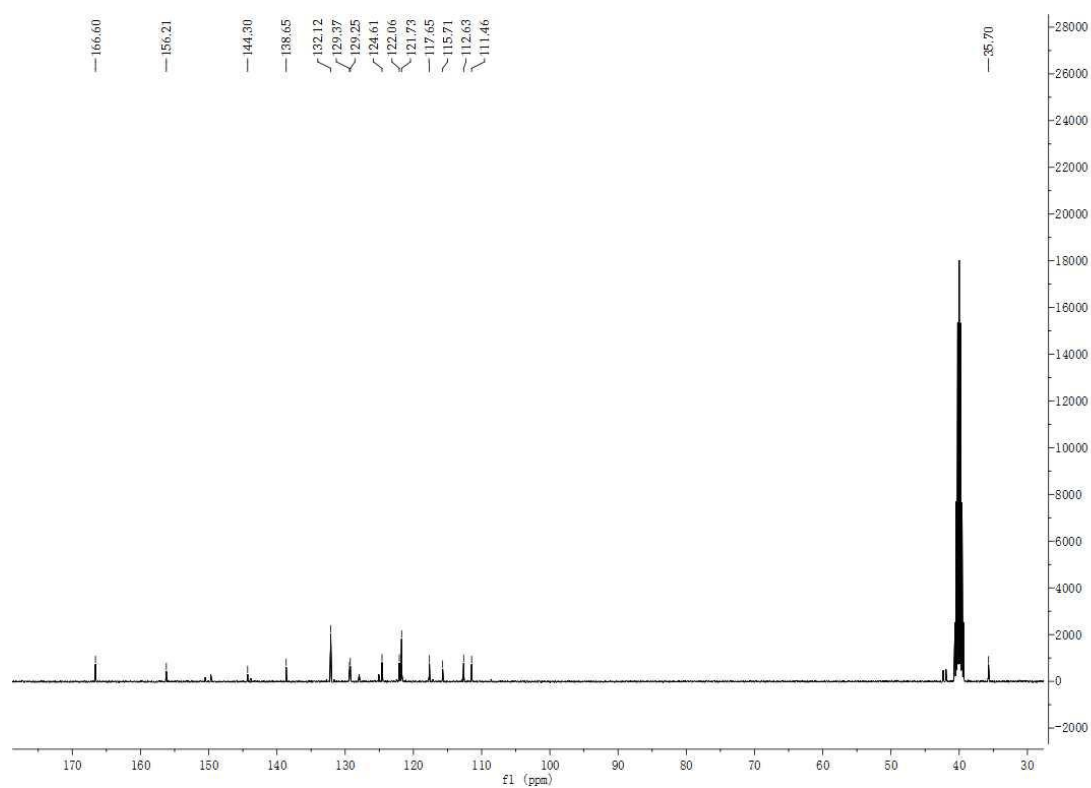

Figure S68. <sup>13</sup>C-NMR spectra of the target compound D14

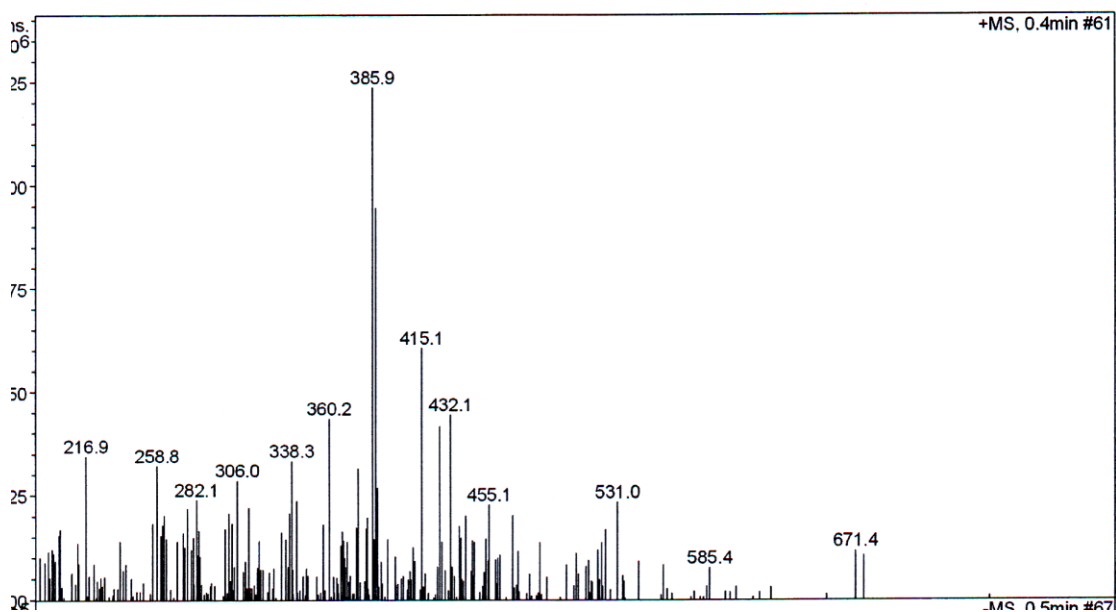

Figure S69. ESI-MS of the target compound D14

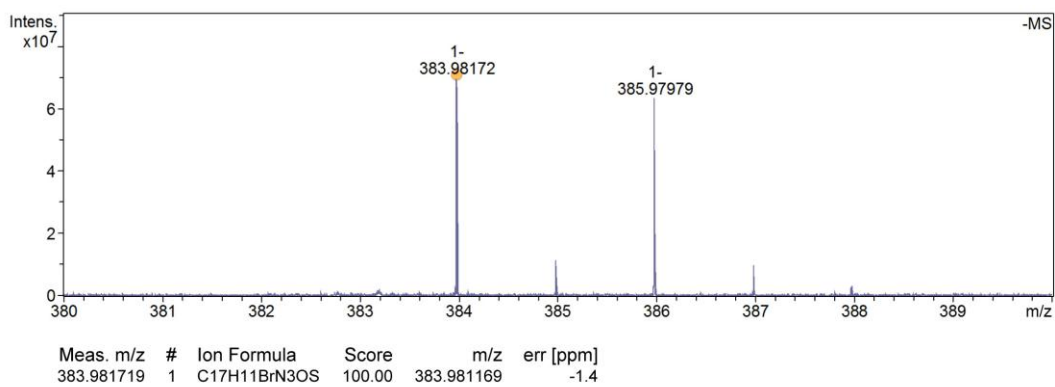

Figure S70. HRMS of the target compound D14

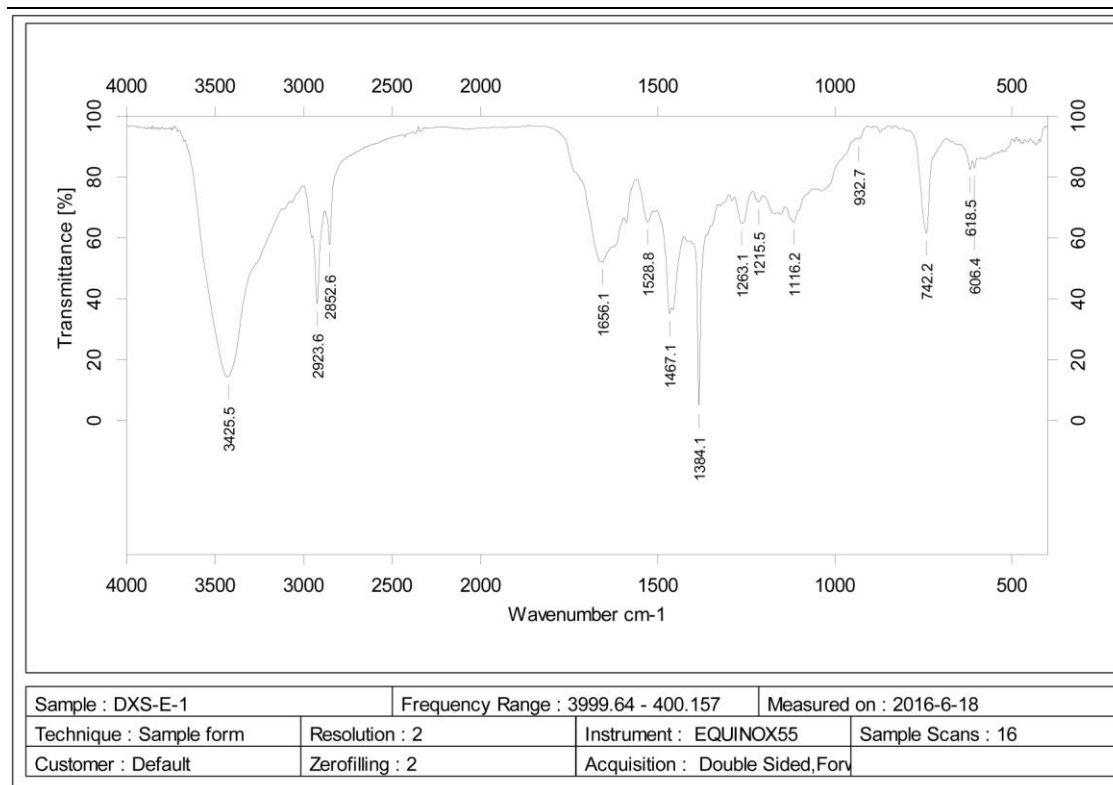

Figure S71. IR spectra of the target compound D15

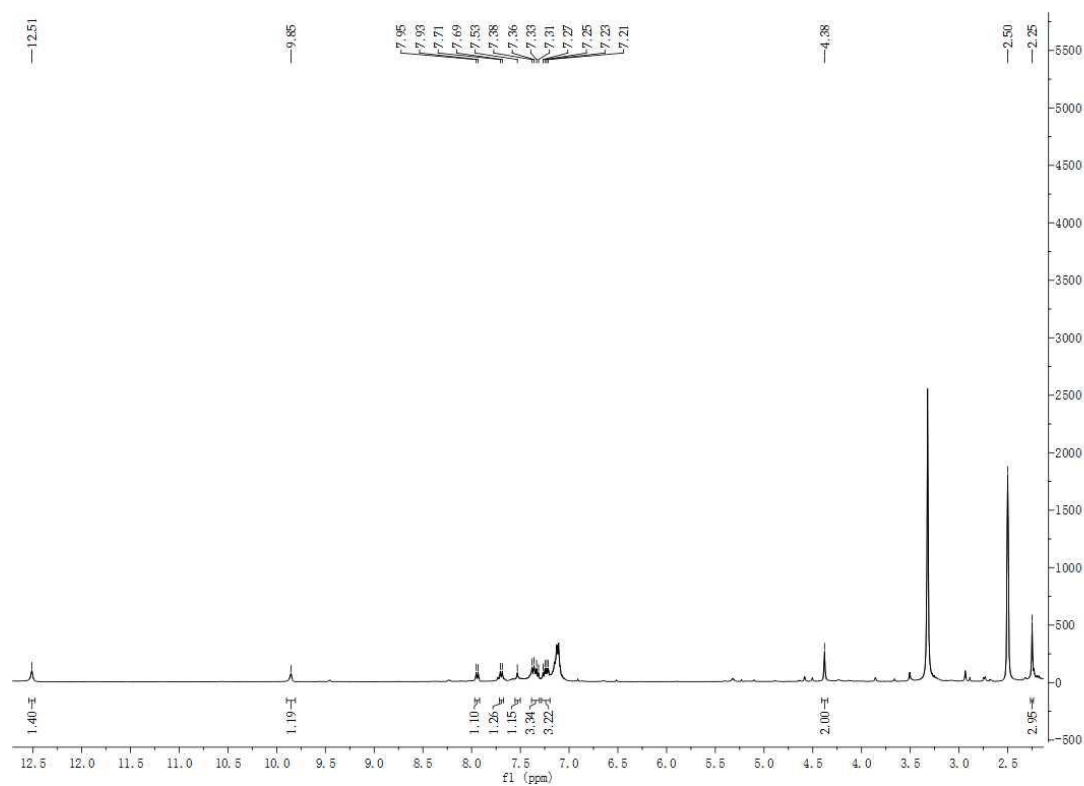

Figure S72. <sup>1</sup>H-NMR spectra of the target compound D15

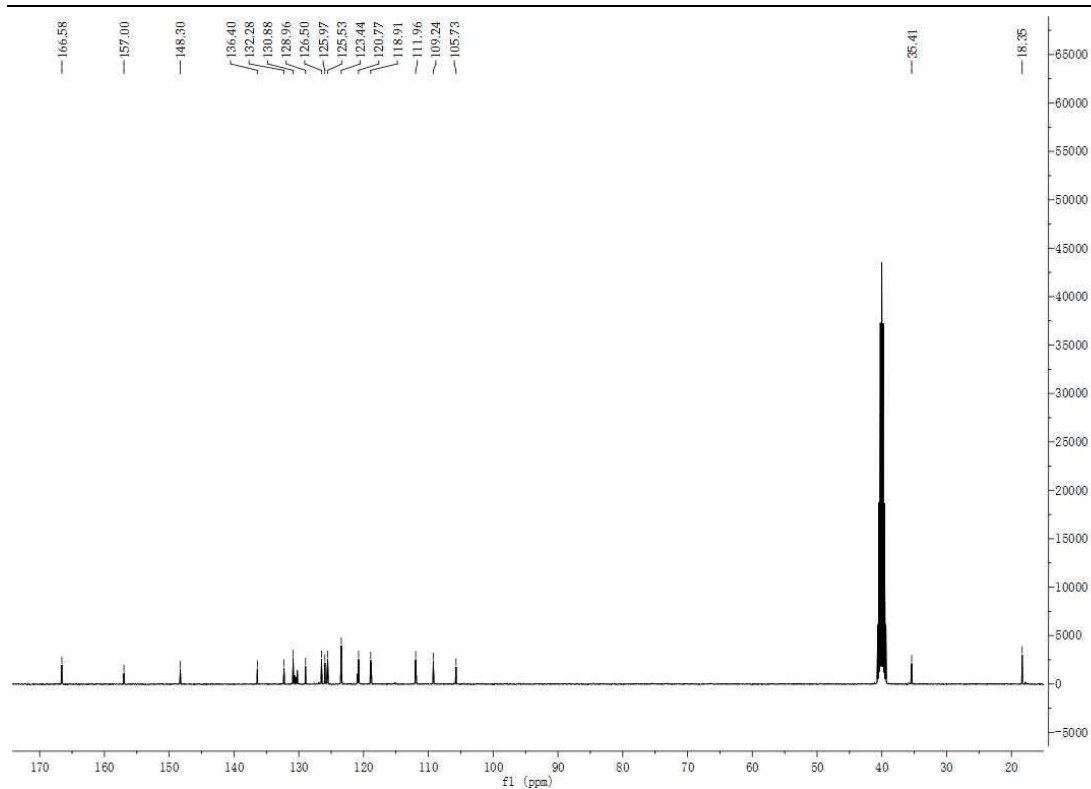

Figure S73.  $^{13}\text{C}$ -NMR spectra of the target compound D15

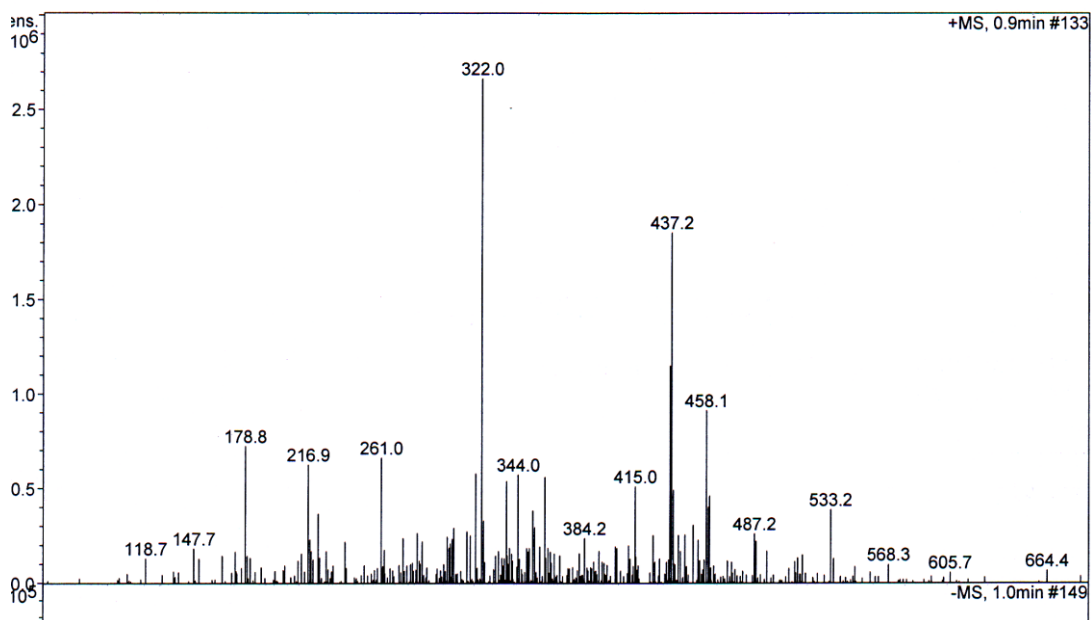

Figure S74. ESI-MS of the target compound D15

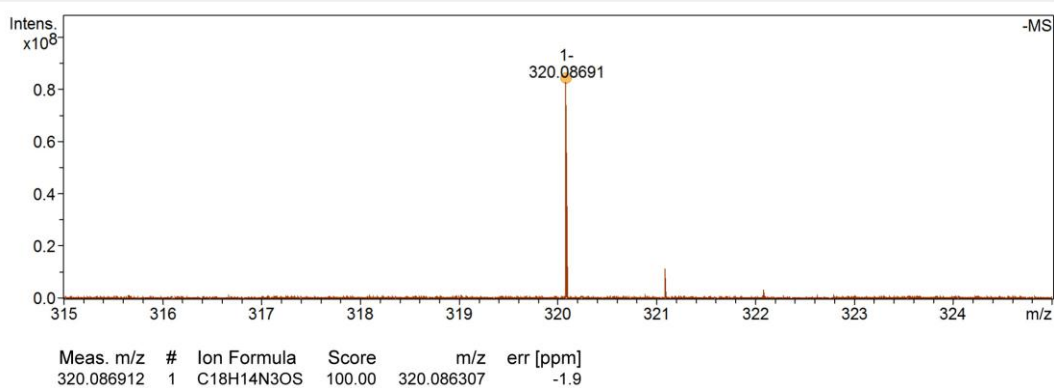

Figure S75. HRMS of the target compound D15

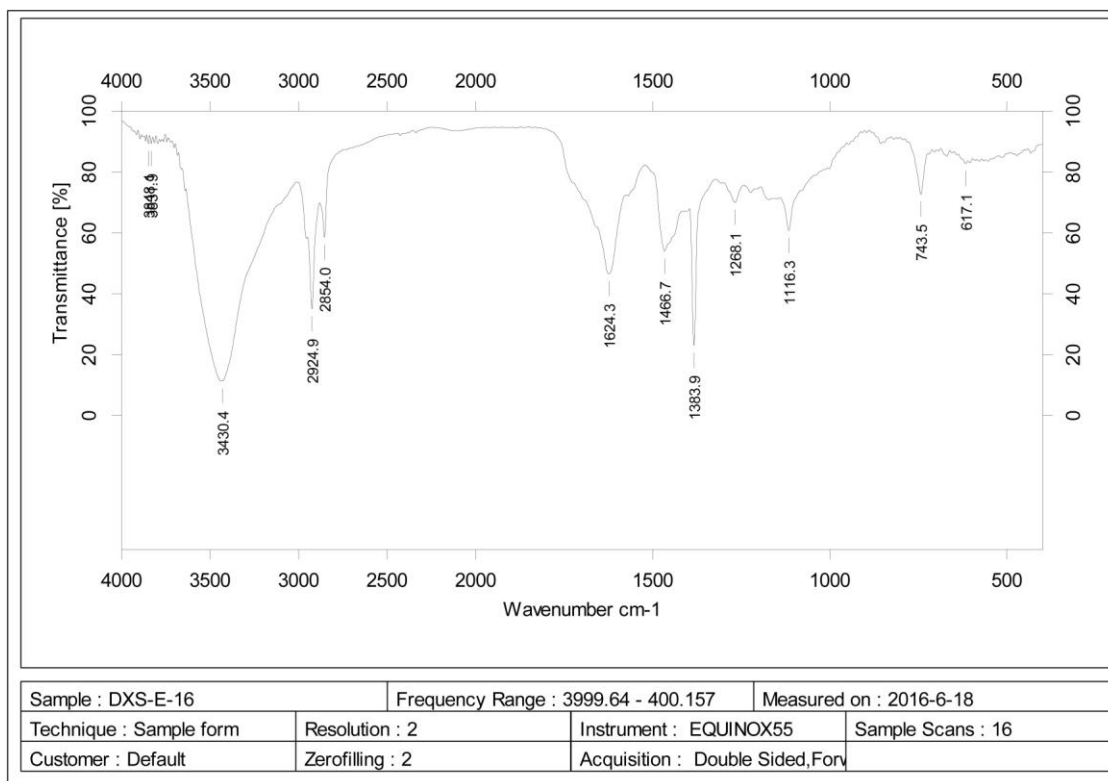

Figure S76. IR spectra of the target compound D16

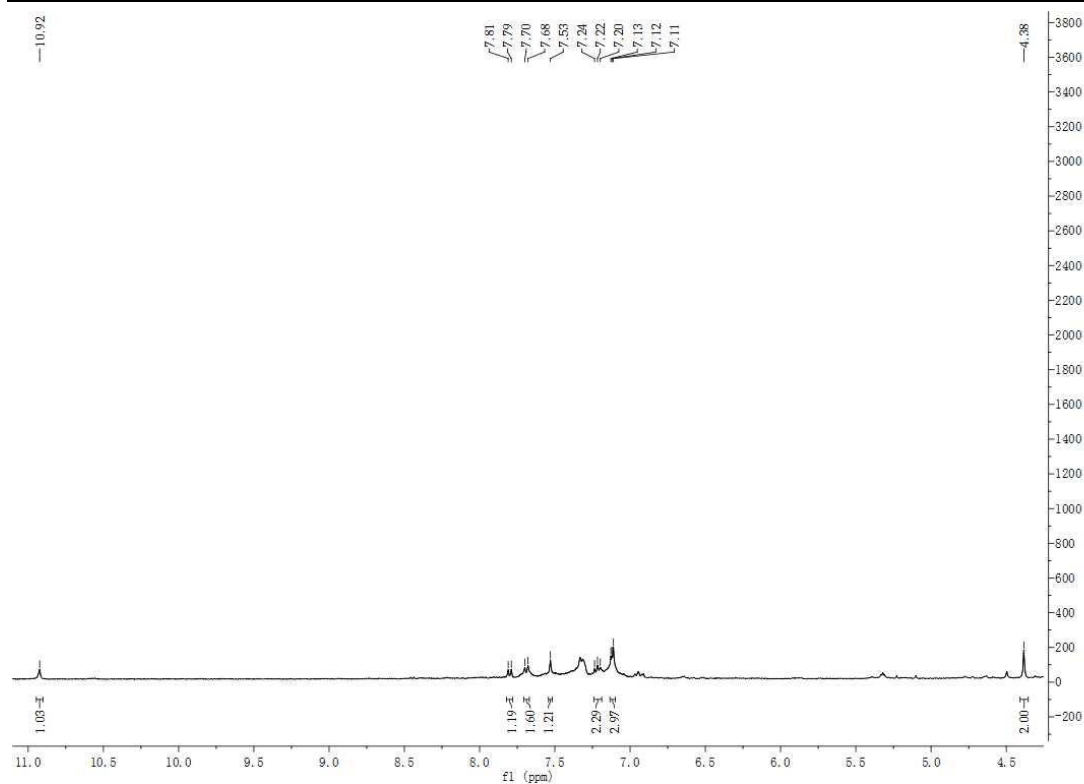

Figure S77.  $^1\text{H}$ -NMR spectra of the target compound D16

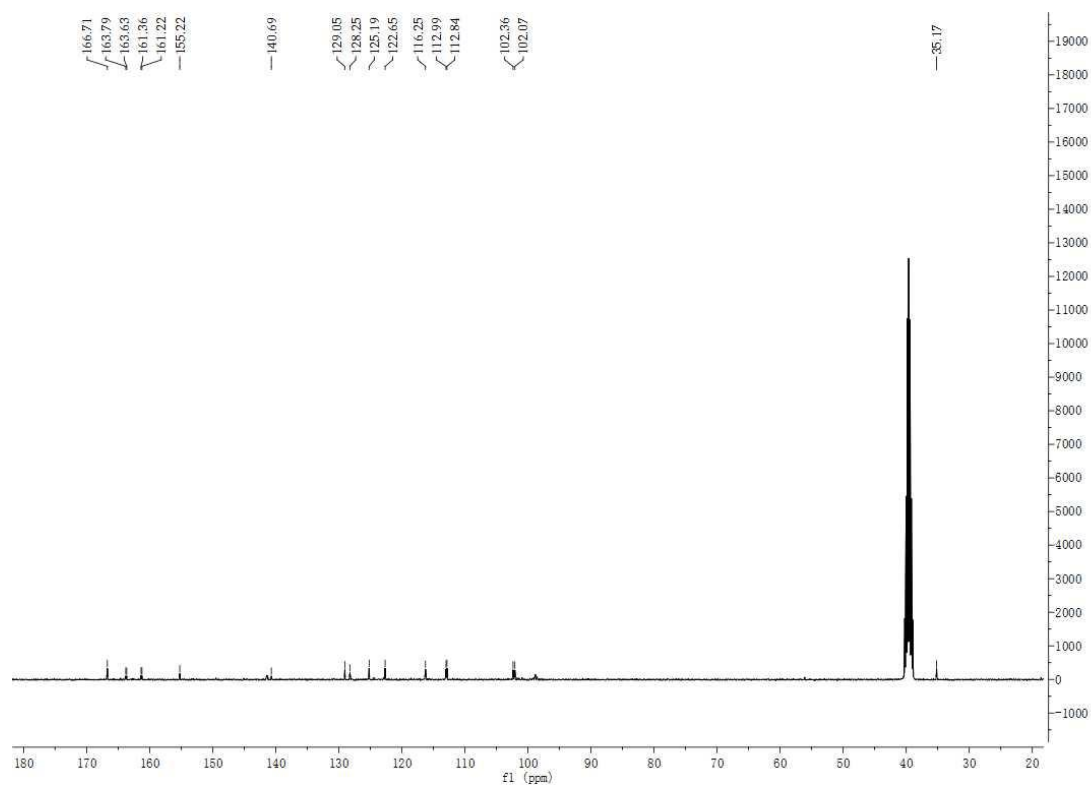

Figure S78.  $^{13}\text{C}$ -NMR spectra of the target compound D16



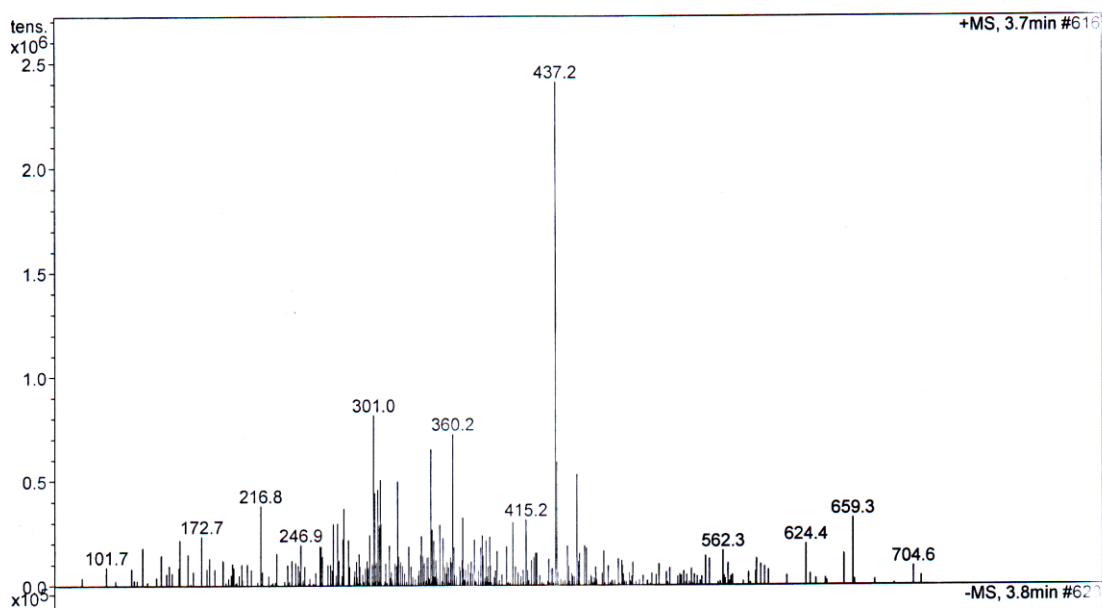

Figure S79. ESI-MS of the target compound D16

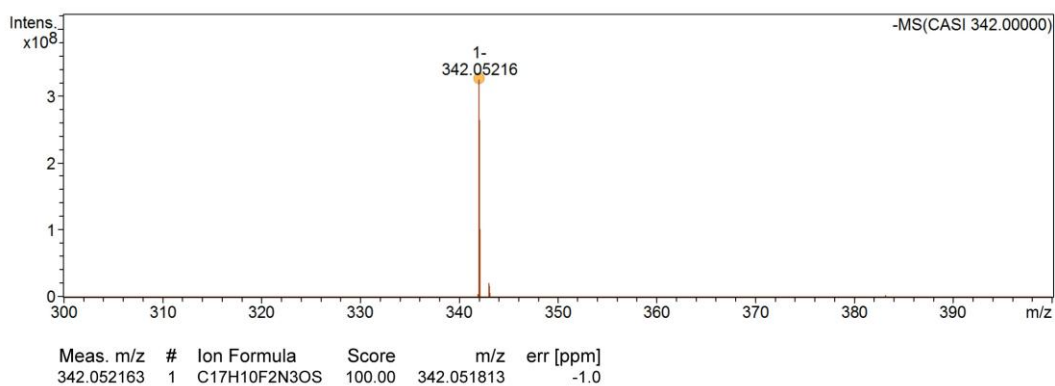

Figure S80. HRMS of the target compound D16

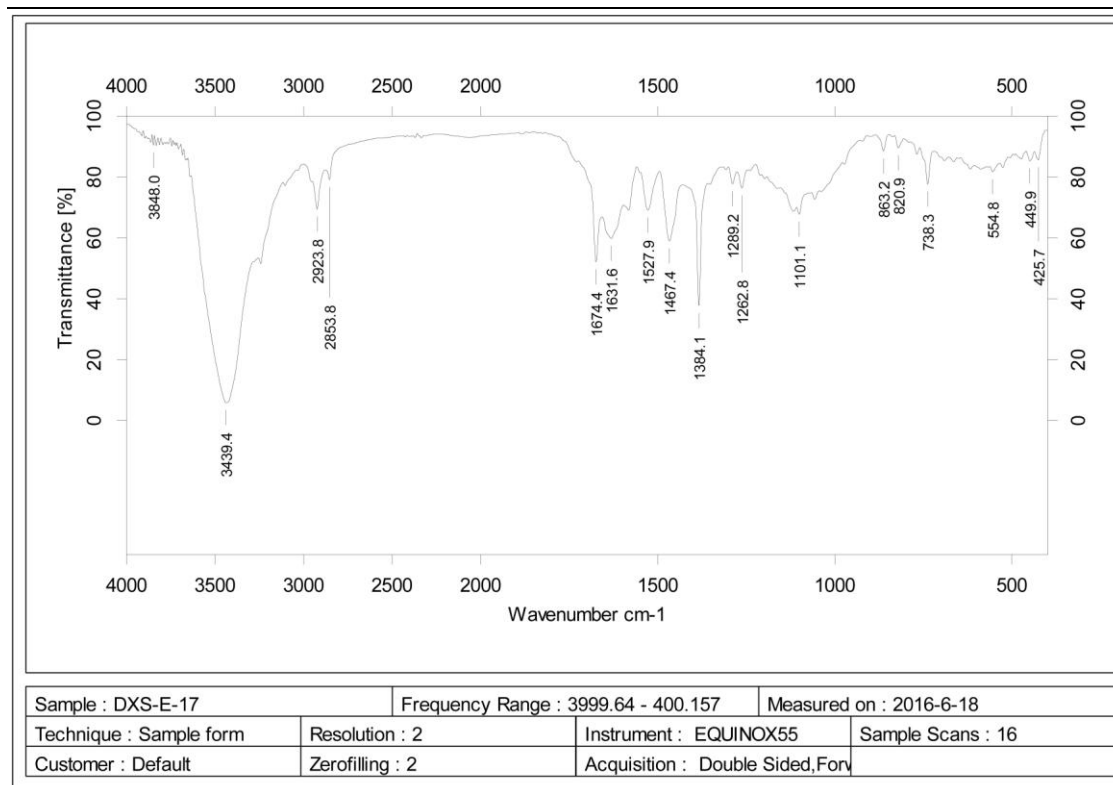

Figure S81. IR spectra of the target compound D17

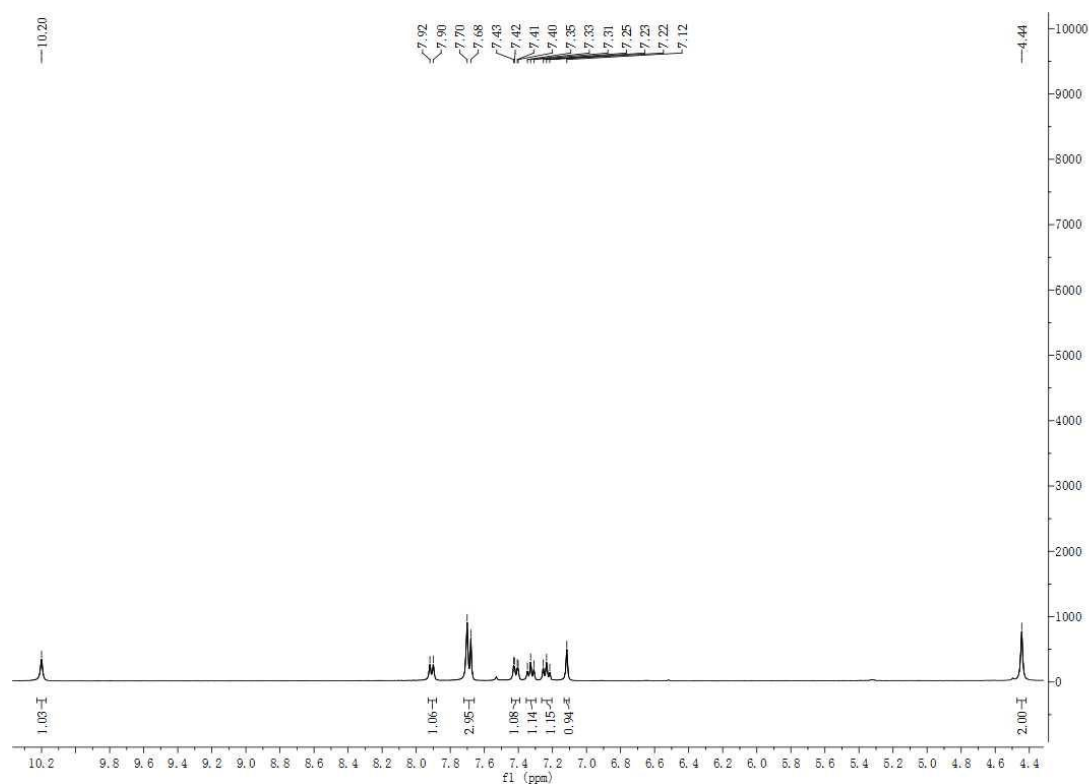

Figure S82. <sup>1</sup>H-NMR spectra of the target compound D17

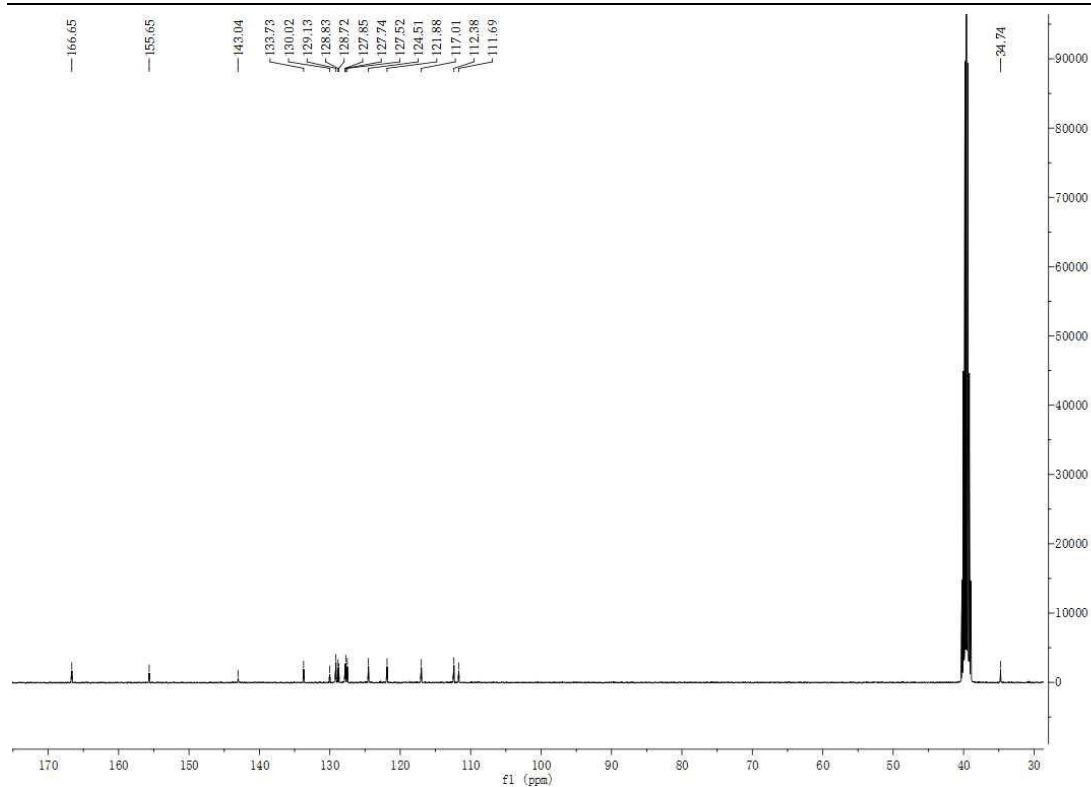

Figure S83.  $^{13}\text{C}$ -NMR spectra of the target compound D17

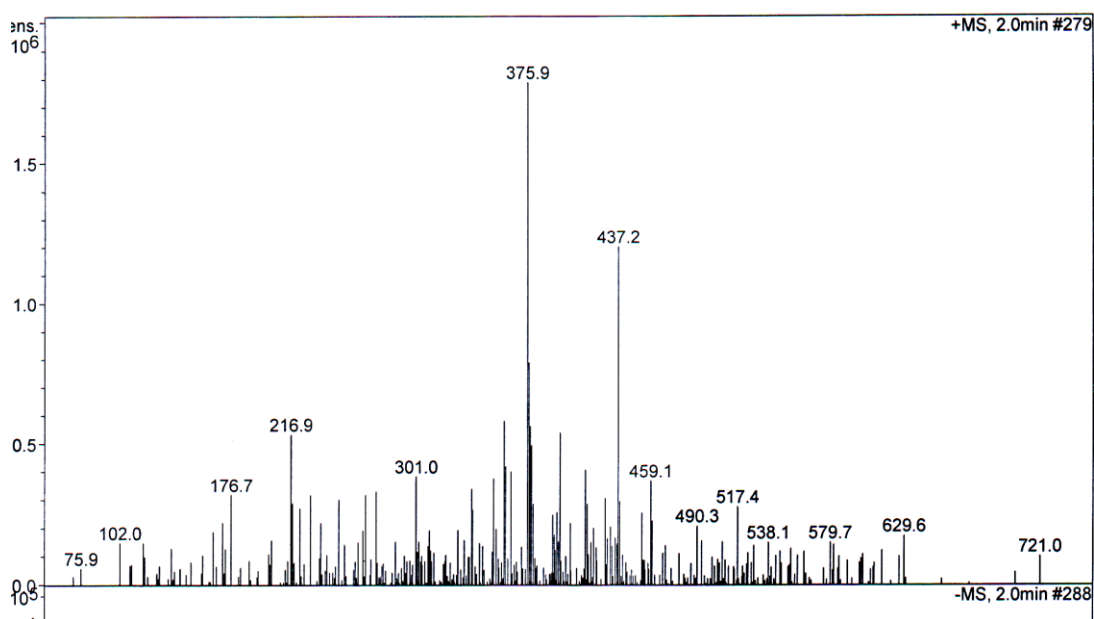

Figure S84. ESI-MS of the target compound D17

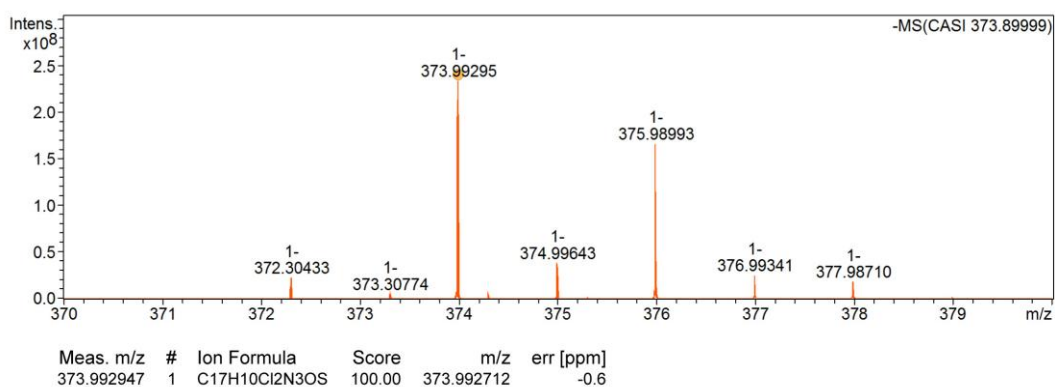

Figure S85. HRMS of the target compound D17

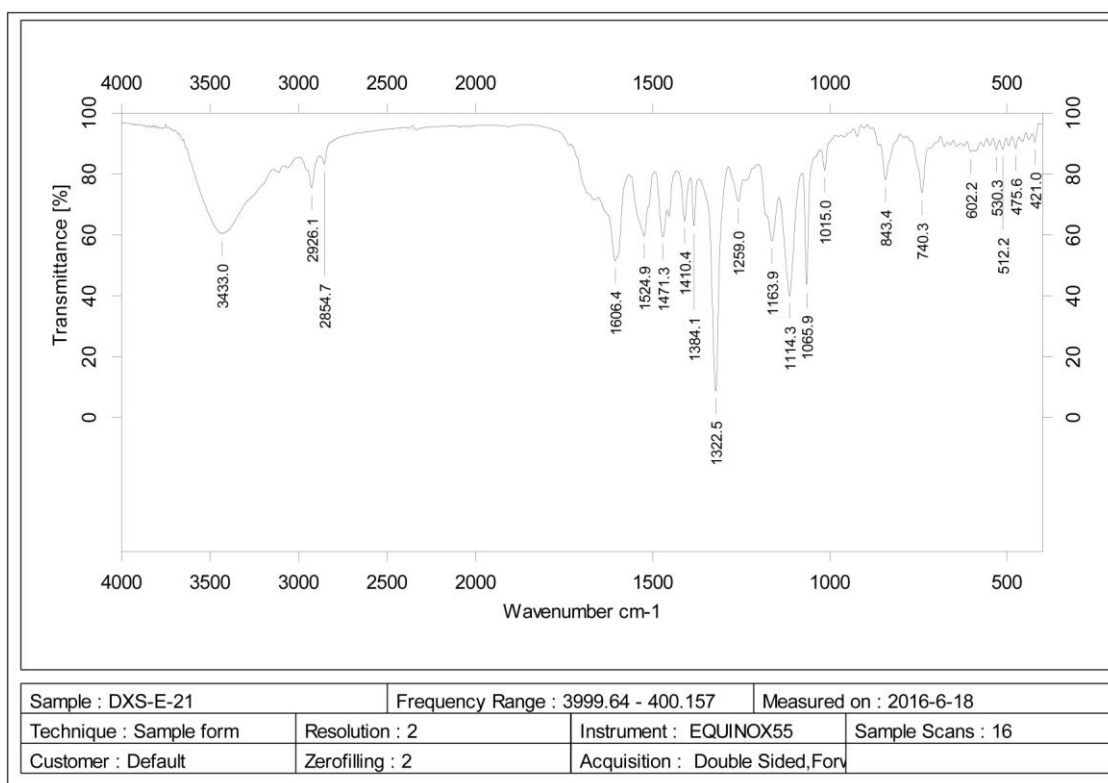

Figure S86. IR spectra of the target compound D18

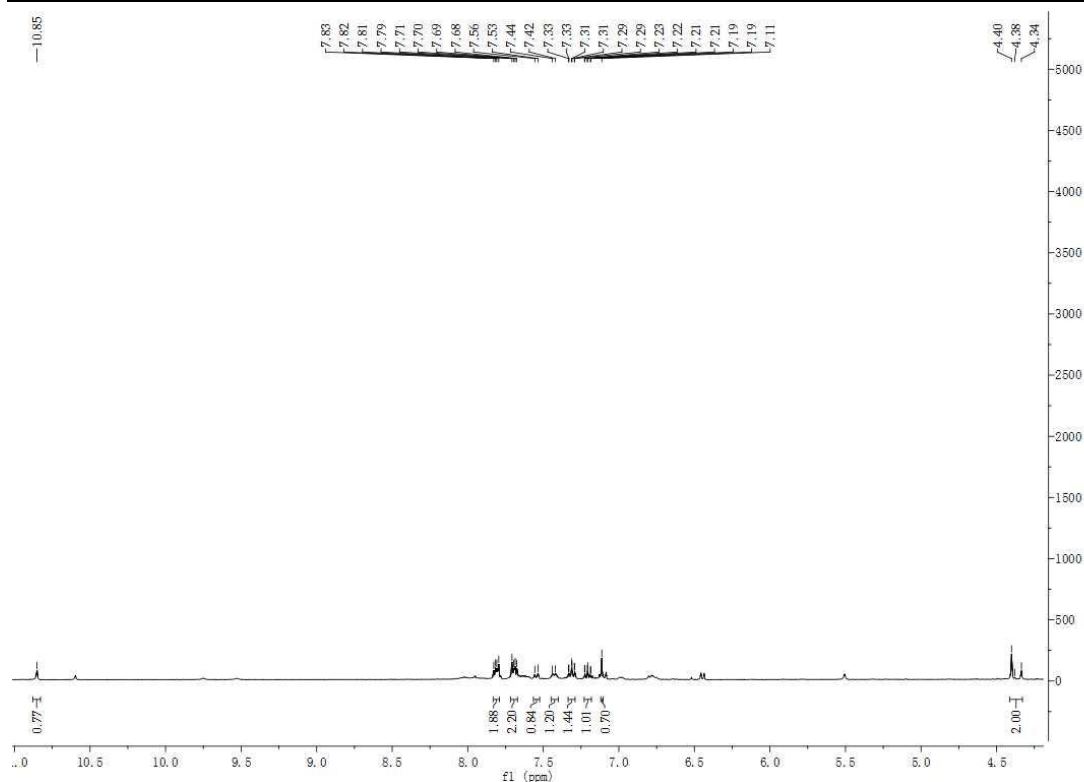

Figure S87. <sup>1</sup>H-NMR spectra of the target compound D18

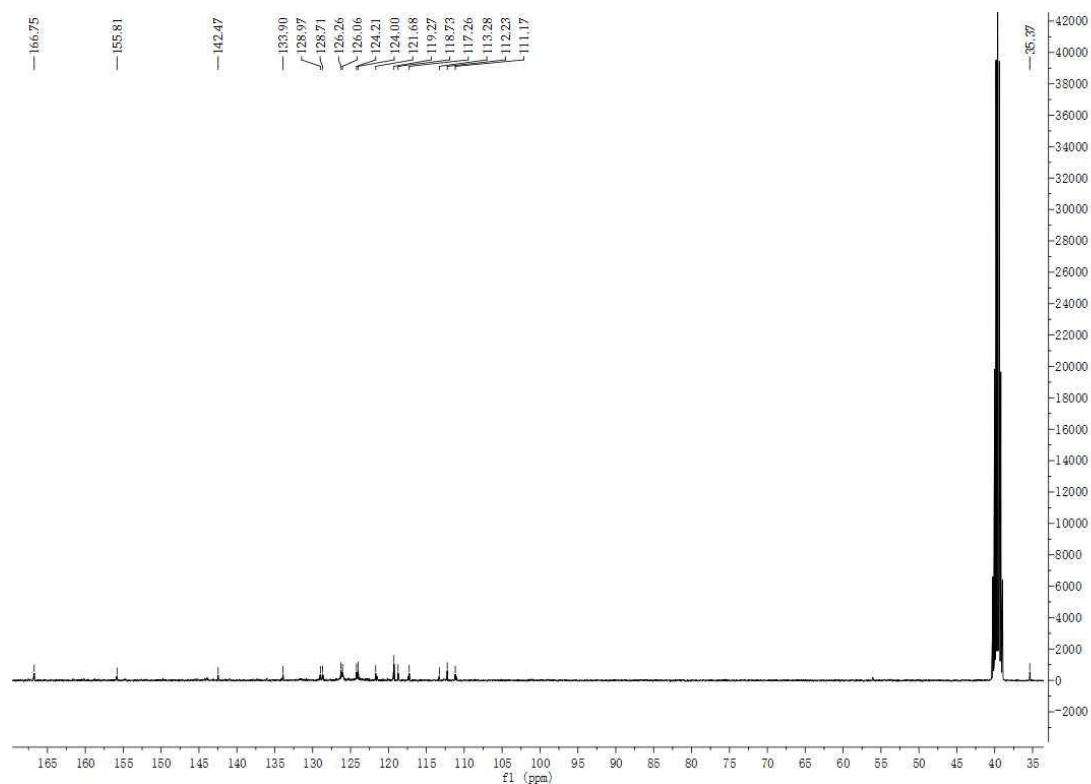

Figure S88. <sup>13</sup>C-NMR spectra of the target compound D18

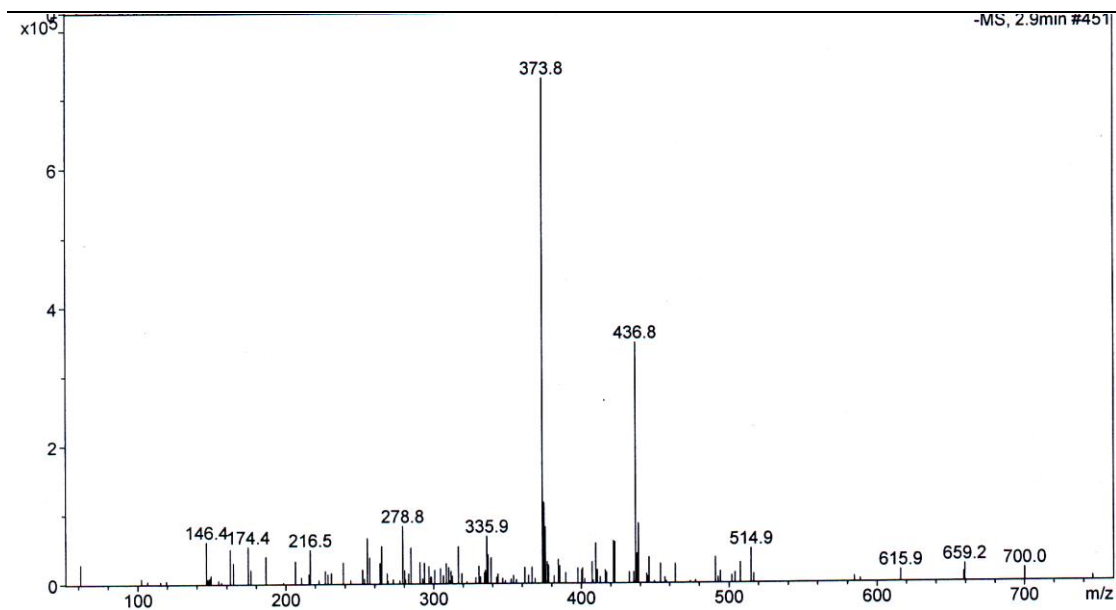

Figure S89. ESI-MS of the target compound D18

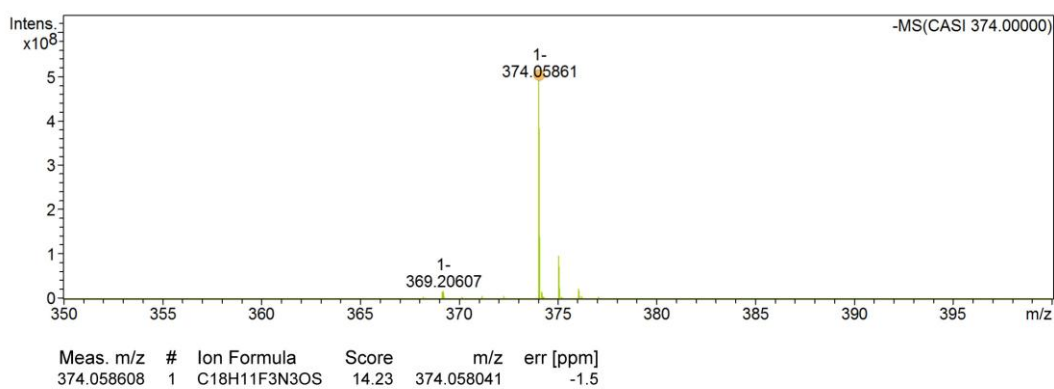

Figure S90. HRMS of the target compound D18
